1 **Initiation phase cellular reprogramming ameliorates DNA damage in the ERCC1 mouse**  
2 **model of premature aging.**

3

4 Patrick Treat Paine<sup>1</sup>, Cheyenne Rechsteiner<sup>2</sup>, Francesco Morandini<sup>2</sup>, Gabriela Desdin Mico<sup>1</sup>,  
5 Calida Mrabti<sup>1</sup>, Alberto Parras<sup>1</sup>, Amin Haghani<sup>3</sup>, Robert Brooke<sup>4</sup>, Steve Horvath<sup>3,4,5</sup>, Andrei  
6 Seluanov<sup>2</sup>, Vera Gorbunova<sup>2</sup>, Alejandro Ocampo<sup>1</sup>

7

8 <sup>1</sup>Department of Biomedical Sciences, Faculty of Biology and Medicine, University of Lausanne,  
9 Lausanne, Vaud, Switzerland.

10 <sup>2</sup>Departments of Biology and Medicine, University of Rochester, Rochester, NY, USA

11 <sup>3</sup> Altos Labs, San Diego, USA

12 <sup>4</sup> Epigenetic Clock Development Foundation, Torrance, CA, USA

13 <sup>5</sup> Human Genetics, David Geffen School of Medicine, University of California, Los Angeles, USA

14

15 **Correspondence:** [alejandro.ocampo@unil.ch](mailto:alejandro.ocampo@unil.ch)

16

17 **Keywords:** progeria, DNA damage, ERCC1, accelerated aging, cellular reprogramming, TGFb

18

19

20

21

22

23

24

25

26

27

28

29

30

31

32

33

34

35

36

37

38

## 39 **Abstract**

40 Unlike aged somatic cells, which exhibit a decline in molecular fidelity and eventually reach a state  
41 of replicative senescence, pluripotent stem cells can indefinitely replenish themselves while  
42 retaining full homeostatic capacity. The conferment of beneficial-pluripotency related traits via in  
43 vivo partial cellular reprogramming (IVPR) significantly extends lifespan and restores aging  
44 phenotypes in mouse models. Although the phases of cellular reprogramming are well  
45 characterized, details of the rejuvenation processes are poorly defined. To understand whether  
46 epigenetic reprogramming can ameliorate DNA damage, we created reprogrammable accelerated  
47 aging mouse model with an ERCC1 mutation. Importantly, using enhanced partial reprogramming  
48 by combining small molecules with the Yamanaka factors, we observed potent reversion of DNA  
49 damage, significant upregulation of multiple DNA damage repair processes, and restoration of the  
50 epigenetic clock. In addition, we present evidence that pharmacological inhibition of ALK5 and  
51 ALK2 receptors in TGF $\beta$  pathway is able to phenocopy some benefits including epigenetic clock  
52 restoration suggesting a role in the mechanism of rejuvenation by partial reprogramming.

53

## 54 **Introduction**

55 The phenomenon of aging is directly linked to a decline in cellular repair functions with an  
56 associated increase in aging phenotypes including genomic instability<sup>1-3</sup>. DNA damage events due  
57 to radiation, reactive oxygen species, chemicals, or replication errors can overwhelm DNA repair  
58 functions and are proposed as a causative factor for epigenetic dysregulation and a key contributor  
59 to age associated pathologies<sup>4-8</sup>. In this line, *Ercc1* <sup>$\Delta$ /-</sup> progeroid mice, harboring a single truncated  
60 *Ercc1* allele required for nucleotide excision repair (NER), interstrand crosslink repair (ICL), and  
61 homologous repair (HR) display increased DNA damage and a broad spectrum of aging  
62 phenotypes including senescence, neurodegeneration, multi-morbidity, and a shortened lifespan<sup>9-</sup>  
63 <sup>13</sup>. Interestingly, a recent comparative lifespan analysis of 18 wildtype rodent species indicates  
64 DNA double-strand break repair was more efficient in long-lived species<sup>14</sup>. For these reasons, DNA  
65 repair mutant *Ercc1* <sup>$\Delta$ /-</sup> mice are an ideal alternative for investigating aging interventions and DNA  
66 repair-related mechanisms of rejuvenation in particular<sup>9,15,16</sup>.

67

68 Cellular reprogramming can be defined as the conversion of a somatic cell to pluripotency and can  
69 be induced via the forced expression of four defined transcription factors; Oct4, Sox2, Klf4, and c-  
70 Myc (OSKM)<sup>17</sup>. The resulting induced pluripotent stem cells (iPSCs) exhibit a dedifferentiated cell  
71 identity similar to embryonic stem cells (ESCs) along with a restoration of aged phenotypes<sup>18,19</sup>.  
72 Recently, in vivo partial reprogramming (IVPR), following short-term cyclic expression of OSKM,  
73 has emerged as a novel therapeutic strategy for the treatment of age-related diseases (ARDs)<sup>20-</sup>  
74 <sup>22</sup>. Specifically, partial cellular reprogramming has produced improvements to lifespan, hallmarks  
75 of aging, the epigenetic clock, and tissue regeneration in progeroid and wildtype mouse models in  
76 vivo<sup>6,23-34</sup>. Multiple in vitro time course studies have demonstrated reprogramming initially

77 proceeds in a multifactorial manner involving extensive epigenetic remodeling, cell cycle induction  
78 with a shorted G1 phase, mesenchymal to epithelial transition due to TGFb inhibition, and BMP  
79 induction, while undergoing a major reset to the proteome and transcriptome<sup>35-45</sup>. Importantly, in  
80 what manner and to what extent these early alterations to molecular and cellular processes via  
81 IVPR counter and reverse aging drivers is currently unknown.

82

83 To address this limitation and gain a deeper understanding of the mechanisms involved in age  
84 amelioration by OSKM induction, we have chosen to investigate the effects of partial  
85 reprogramming in the *Ercc1*<sup>Δ/-</sup> DNA damage model of accelerated aging. Using an in vitro time  
86 course capable of dissecting time dependent processes, we characterized the early events of  
87 reprogramming in a novel reprogrammable *Ercc1*<sup>Δ/-</sup> accelerated aging mouse model. Most  
88 importantly, we observed a significant reduction in DNA damage beginning at 2 days of  
89 reprogramming demonstrating reversal of a key hallmark of aging. At the same time RNA seq  
90 analysis shows a significant upregulation of nearly every major DNA repair pathway while DNA  
91 methylation clock analysis shows a reversal of epigenetic age. Interestingly, improvements were  
92 more robust in the *Ercc1* DNA damage model versus the wildtype cells, as would be expected from  
93 an improvement to homeostatic capacity. Lastly, small molecule inhibition of the TGFb pathway  
94 was sufficient to phenocopy some rejuvenating aspects of reprogramming including a decrease in  
95 nuclear size, decreased γH2AX, and restoration of the epigenetic clock.

96

## 97 **Results**

### 98 **Induced reprogramming in a mouse model of accelerated aging decreases DNA damage**

99 OSKM-mediated partial cellular reprogramming has been shown to mitigate genomic instability  
100 and epigenetic alterations in wildtype and Lamin A mutant mouse fibroblasts as well as in vitro  
101 aged nucleus pulposus cells<sup>23,31</sup>. On other hand, it is currently unknown whether this restoration  
102 would occur in an *Ercc1* DNA damage model of accelerated aging with defects in DNA repair. To  
103 address this question, we developed a novel doxycycline-inducible mouse model of  
104 reprogrammable aging (*Ercc1*<sup>Δ/-</sup> 4Fj<sup>+/-</sup> rtTA<sup>+/-</sup>) containing a single truncated *Ercc1* allele, Col1a1-  
105 tetO-OKSM polycistronic transgene, and the ROSA26-M2-rtTA allele (Fig. 1a).

106

107 To first verify the presence of DNA damage in our reprogrammable progeria model, adult tail tip  
108 fibroblasts (FBs) were isolated from the 4Fj *Ercc1*<sup>Δ/-</sup> (D/KO) and 4Fj *Ercc1*<sup>+/+</sup> (WT) mice, stained  
109 for the DNA damage marker γH2AX, and imaged with confocal laser microscopy. As expected, a  
110 significant increase in γH2AX fluorescence was observed in the D/KO fibroblasts compared to the  
111 WT (Fig. 1c, s1a). In addition, this accelerated aging cell model also displayed a significant  
112 increase in nuclear area in these samples, based on nuclear staining with DAPI (Fig. S1b). This  
113 experiment confirmed the presence of a DNA repair defect in our novel OSKM inducible mouse  
114 model of aging along with an enlarged nucleus compared to WT (Fig. S1a,b).

115

116 In vitro cellular reprogramming time course experiments have previously been used to identify  
117 three phases of reprogramming including initiation, maturation, and stabilization<sup>46,47</sup>. Initiation  
118 phase proceeds via alterations to several key biological processes including proliferation,  
119 chromatin modification, DNA damage repair, mesenchymal to epithelial transition (MET), and RNA  
120 processing<sup>33,41–45,48–50</sup>. To gain insight into partial reprogramming processes with the capacity to  
121 restore homeostatic function in a DNA damage model, a time course analysis of the initiation phase  
122 of reprogramming was performed (Fig. 1b). At the same time, the induction of pluripotency in  
123 somatic cells following OSKM expression is a stochastic, asynchronous, and inefficient process  
124 often taking weeks with a low percentage of iPSC colonies<sup>51,52</sup>. To facilitate an accelerated  
125 reprogramming process and enhance the ability to delineate reprogramming-induced aging  
126 phenotypes in bulk cultures a previously identified small molecule combination, Vitamin C (V) and  
127 CHIR-99021 (C), was selected<sup>53–55</sup>. Alone, Vitamin C is able lower the epigenetic barrier of  
128 pluripotent gene expression due to its function as a histone demethylase and Tet enzyme cofactor  
129 while CHIR activates the Wnt pathway and promotes glycolysis via GSK3-beta inhibition<sup>56–58</sup>.

130

131 To confirm the induction of cellular reprogramming following expression of OSKM in our  
132 reprogrammable DNA damage model, doxycycline (2ug/mL) was added to 4F Ercc1 cells in culture  
133 alone or combined with VC and imaged with brightfield microscopy at 4x during days 0 – 4 (Fig.  
134 1a,b). A clear shift in cell morphology with a cobblestone appearance associated with MET is  
135 present after 2 days, more so after 4 days, and most strongly in the enhanced D4+VC group (Fig.  
136 1e). Expression of the Klf4 and Sox2 transcription factors were observed only after doxycycline  
137 induction and most strongly at d4+VC but never day 0 based on immunofluorescence (IF) laser  
138 confocal imaging (Fig. 1d, S1c). These cells retained the fibroblast identity marker Thy1.2 at D4  
139 with or without VC, as shown by flow cytometry, indicating this mouse model and experimental  
140 setup successfully represent initiation phase partial reprogramming without dedifferentiation or  
141 entrance into a pluripotent state (Fig. 1g, s1d).

142

143 In regards to the effects of cellular reprogramming on yH2AX in this DNA damage model, we first  
144 used flow cytometry. Specifically, two days of doxycycline induced reprogramming in the D/KO  
145 was sufficient to decrease median yH2AX fluorescent intensity per cell by 38% (Fig. S1e). Next,  
146 using IF and confocal imaging, we observed a significant decrease in mean yH2AX level per cell  
147 after 2 and 4 days of reprogramming (Fig. 1g, h, S1j). Similarly, enhanced reprogramming with VC  
148 also restored this DNA damage marker significantly after 2 and 4 days of OSKM induction (Fig.  
149 1g, h, S1j). These D/KO cells also displayed a significant reduction in nuclear size during  
150 reprogramming after induction with doxycycline for 2 or 4 days (Fig. 1i). When this experiment was  
151 repeated on OSKM inducible WT cells without the DNA repair defect, it also showed a significant  
152 decrease in yH2AX signal and decrease in nuclear area (Fig. S1f). Thus, initiation phase cellular

153 reprogramming is sufficient to ameliorate a key driver of aging even in mutant cells defective for  
154 DNA repair responsible for NER, ICL, and HR.

155

### 156 **The DNA methylation clock is restored in *Ercc1*<sup>Δ/-</sup> following short term reprogramming**

157 Recent evidence from our lab indicates that D/KO FBs display accelerated aging based on the  
158 DNA methylation clock and are therefore a good *in vitro* model to investigate aging mechanisms  
159 and interventions<sup>59</sup>. Furthermore, cellular reprogramming has been observed to reverse epigenetic  
160 age in mouse and human cell types but the effects on an accelerated aging model with a DNA  
161 repair defect are unknown<sup>60,61</sup>. In order to investigate the effect of reprogramming on the DNA  
162 methylation clock, we applied the DNA Methyl Age Skin Final clock to all samples and timepoints.  
163 Strikingly, enhanced reprogramming with VC for 4 days in the D/KO produced a significant  
164 restoration to the DNA methylation clock with the top responder showing a 54% decrease in  
165 epigenetic age (Fig. 2a). At the same time, there was a trend towards epigenetic clock restoration  
166 after 2 and 4 days of reprogramming although not significant, perhaps due to less efficient  
167 reprogramming (Fig. 2a). Significant restoration to the DNAm clock only occurred at day 2 in WT  
168 FBs (Fig. s2a). In addition, variability was greater in the WT samples perhaps due to the stochastic  
169 nature of reprogramming and the early time point chosen for analysis, or the lack of accelerate  
170 aging phenotype (Fig. s2a). The robust reversal of the DNAm clock in the D/KO FBs indicates  
171 enhanced reprogramming is capable of cellular rejuvenation in an aging model with defective DNA  
172 repair.

173

174 Next, as chromatin remodeling and reversal of the DNA methylation clock are observed to coincide  
175 during cellular reprogramming, we sought to understand the epigenetic alterations that occur  
176 following reprogramming in this *Ercc1* model<sup>48,61</sup>. First, a significant increase in H3K9me3 was  
177 observed in the D/KO fibroblasts compared to WT controls based on IF confocal imaging at 100x  
178 (Fig. 2b, s2b). A similar increase was observed in the heterochromatin mark H4K20me3 while  
179 H3K27me3 remained unchanged under the same conditions (Fig. s2d, e). These results were then  
180 confirmed with western capillary analysis (Fig s2c). We hypothesize that this *in vitro* phenotype of  
181 chromatin compaction is an adaptation in these cells to protect against chronic elevated DNA  
182 damage levels<sup>62,63</sup>. Interestingly, when reprogramming or enhanced reprogramming was induced  
183 for 2 or 4 days, heterochromatin was significantly decreased in this DNA damage model shifting it  
184 towards wildtype levels (Fig. 2c, d, e, s2g, h, i, and j). This restoration of heterochromatin levels in  
185 D/KO FBs coincides with improvement to reversion of the DNAm clock, in line with previous reports  
186 suggesting a mechanistic relationship<sup>6,23,32</sup>.

187

### 188 **Homeostatic capacity is significantly upregulated during the initiation phase of cellular** 189 **reprogramming**

190 To better understand the effects of reprogramming in this DNA damage model, paired-end bulk  
191 RNA sequencing and analysis was performed for each treatment and time point. Principal  
192 component analysis (PCA) based on relative gene expression values confirmed groups clustered  
193 based on the treatment, timepoint, and cell type while displaying a reprogramming trajectory from  
194 day 0 to day 4 (Fig. 3a). Interestingly, the enhanced reprogramming at day 2 plus VC was equal  
195 to 4 days of reprogramming alone based on overlapping PCA scores (Fig. 3a). At the same time,  
196 D/KO cells displayed a larger shift in PC2 score than WT following reprogramming (Fig. 3a). Venn  
197 diagrams and associated gene expression heat maps were created based on the normalized  
198 transcriptomes from each group and demonstrate a shared gene profile during reprogramming  
199 albeit with some unique differences (Fig. 3b, 3c). In particular, over 1400 genes were uniquely  
200 upregulated and 992 downregulated in the D/KO Fbs during initiation phase with enhanced  
201 reprogramming compared to reprogrammed WT cells (Fig. 3c). The most robust changes were  
202 observed following enhanced reprogramming to the D/KO group, indicating a profound and rapid  
203 reset to the transcriptome in this DNA damage model (Fig. 3b, 3c). GO term analysis demonstrated  
204 a significant upregulation of DNA damage repair pathways in the D/KO enhanced reprogramming  
205 group including DNA repair, homologous recombination (HR), non-homologous end joining  
206 (NHEJ), base excision repair (BER), mismatch repair (MMR), nucleotide excision repair (NER),  
207 and alternative end joining (AltEJ), while interstrand crosslink repair (ICR) showed a trend towards  
208 upregulation. (Fig. 3d, S3a). At the same time, reprogramming in WT cells did not produce such  
209 broad and robust effects on DNA repair processes (Fig. 3d, S3a). Other notable processes  
210 increased with enhanced reprogramming include chromatin organization pathways in D/KO cells  
211 (Fig. 3d, S3a). Importantly, there was also a significant downregulation in TGFb receptor signaling  
212 and TGFb regulation pathways as well as a decrease in EMT pathways (Fig. 3d, S3a). Gene set  
213 enrichment analysis (GSEA) showed that intermediate filament cytoskeleton organization and  
214 processes, keratinocyte differentiation and epidermal differentiation were significantly upregulated  
215 at all timepoints and models (Fig. S3b). At the same time, Reactome analysis showed that  
216 Keratinization and Formation of the Cornified Envelope were also universally upregulated (Fig.  
217 S3c). Together, this transcriptomic data provides a mechanistic basis that supports the observed  
218 changes to morphological, epigenetic, and DNA damage phenotypes that occur following short-  
219 term reprogramming in our DNA damage model. Interestingly, the robust upregulation of major  
220 DNA repair processes in the Ercc1 model vs WT suggest a homeostatic process capable of  
221 responding to intrinsic molecular and age-related defects that characterized Ercc1 cells.

222

### 223 **TGFb inhibition alone improves DNA damage phenotypes and rejuvenates the DNA** 224 **methylation clock**

225 The RNA seq analysis showing downregulation of TGFb signaling and associated epithelial to  
226 mesenchymal transition pathways is a well-documented early event of cellular reprogramming  
227 following OSKM induction<sup>35,40,41,64</sup>. In contrast, upregulation of TGFb signaling is a driver of aging

228 phenotypes including cell degeneration, fibrosis, ROS, inflammation, DNA damage, senescence,  
229 and stem cell aging<sup>65-68</sup>. Recently our lab observed that inhibition of the TGFb pathway is able to  
230 extend lifespan in *C. elegans*, supporting its role in aging and longevity<sup>69</sup>. Based on these  
231 observations, we asked whether TGFb inhibition alone could impact DNA damage and the DNA  
232 methylation clock in our *Ercc1* accelerated aging model in a manner similar to reprogramming (Fig.  
233 3a). In this line, the TGFb superfamily consists of over 30 subtypes but for this study we focused  
234 on canonical TGFb signaling and the bone morphogenic protein pathway (BMP) as both have been  
235 identified to be important for early stage reprogramming<sup>41,53,70</sup>. Specifically, 9 inhibitors that target  
236 the TGFb ALK5 receptor and 6 inhibitors that target the BMP ALK2 receptors were screened for 3  
237 days on D/KO fibroblasts. Following a cell viability study to confirm a safe dosage range, a high or  
238 low dose of each inhibitor was added to the *Ercc1* fibroblasts for 3 days and analyzed for changes  
239 to  $\gamma$ H2AX using IF and confocal microscopy (Fig. S4a). Surprisingly, all of the ALK5 inhibitors  
240 successfully decreased  $\gamma$ H2AX levels based on IF, although in some cases it was dose-dependent  
241 (Fig. 4b). Similarly, all but one of the ALK2 inhibitors also decreased DNA damage in *Ercc1*  
242 fibroblasts, although not as effectively as the ALK5 inhibitors, again in a dose dependent manner  
243 (Fig. 4c). Subsequently, we repeated these experiments with only the top performers including  
244 ALK5 inhibitors Repsox and A83-01, ALK2 inhibitor DMH-1, and dual ALK5 and ALK2 inhibitor  
245 Vactosertib. Once again, each of the inhibitors decreased the  $\gamma$ H2AX signal of *Ercc1* fibroblasts  
246 below control levels although the ALK2 inhibitor, DMH-1, was less effective than the three ALK5  
247 inhibitors (Fig. s4b). Interestingly, when nuclear area was calculated based on DAPI staining,  
248 DMH-1 was also the only inhibitor not to show a trend towards decreased nuclear size potentially  
249 implying an association between nuclear size changes and improvements in DNA repair (Fig. s4).  
250 In contrast, other small molecules previously shown to induce pluripotency when applied as a  
251 cocktail were unable to decrease  $\gamma$ H2AX levels in *Ercc1* fibroblasts when applied individually  
252 including valproic acid (VPA), CHIR, tranilcypromine (TCP), Forskolin, DZNep, or TTNPB (Fig.  
253 s4c)<sup>71,72</sup>. When the ALK5 inhibitor, Repsox, was combined with 4 days of reprogramming, no  
254 added benefit to  $\gamma$ H2AX levels was observed (Fig. S4d). Finally, significant rejuvenation of the  
255 DNA methylation clock was observed with 3 of the 4 inhibitors, including Repsox, A83-01, and  
256 DMH-1 (Fig. 4d). This data demonstrates that ALK5 and ALK2 inhibition is able reduce DNA  
257 damage and restore the DNA methylation clock in this *Ercc1* accelerated aging model.  
258 RNA-seq analysis was next performed in *Ercc1* FBs following treatment with these four TGFb  
259 inhibitors to better understand the mechanistic basis for improved DNA damage and a rejuvenated  
260 DNA methylation clock with ALK2 or ALK5 inhibition. Notably, PCA scores show the three ALK5  
261 inhibitors cluster tightly together compared to the ALK2 inhibitor (Fig. 4e). Interestingly, all 4  
262 inhibitors shifted the D/KO transcriptome along the PC2 axis in the direction of WT cells with the  
263 greatest change observed following treatment with A83-01 (Fig. 4e). At the same time, Venn  
264 diagrams show 558 genes were upregulated and 371 downregulated by all 4 inhibitors indicating  
265 similarity in gene expression profile regardless of target receptor (Fig. 4f). Next, gene set

266 enrichment analysis (GSEA) shows significant decreases to spindle checkpoint signaling with  
267 Repsox, Vactosertib, and A83-01 but not with DMH-1 (Fig. S4e). DMH-1 had a unique effect on  
268 upregulation of response to virus, response to interferon-gamma, and response to interferon-beta  
269 among others based on the GSEA (Fig. S4e). Repsox uniquely induced upregulation to  
270 developmental-related gene sets including embryonic hindlimb morphogenesis, hindlimb  
271 morphogenesis, and midbrain development (Fig. S4e). Reactome analysis showed that DMH-1  
272 also uniquely increased interferon signalling (Fig. S4e). Interestingly, GO term analysis  
273 demonstrated that all four inhibitors significantly downregulated several biological processes  
274 including mitotic cell cycle and canonical glycolysis (Fig. S5a). In line with previous publications  
275 showing TGFb inhibition disrupts DNA repair processes in cancer cells and HSCs, these four  
276 inhibitors also disrupted several DNA repair processes in our Ercc1 FBs (Fig. S5a)<sup>65,73-75</sup>.  
277 Interesting exceptions include a significant improvement to NER by DMH-1 and a trend towards  
278 upregulated ICL repair amongst all (Fig. S5a) Together this data shows ALK5 and ALK2 inhibitors  
279 are capable of decreasing the DNA damage marker  $\gamma$ H2AX and restoring the DNA methylation  
280 clock in Ercc1 fibroblasts while sharing some changes to the transcriptomic profiles.

281

### 282 **TGFb inhibition phenocopies aspects of initiations phase cellular reprogramming**

283 To investigate and compare shared rejuvenation processes between cellular reprogramming and  
284 TGFb inhibition, we next evaluated significant transcriptomic changes among the different  
285 treatments. Notably, a heatmap of significantly up or down regulated genes among the different  
286 treatments indicate a similar profile (Fig. 5c). Specifically, 684 shared DEGs were upregulated and  
287 627 downregulated following treatment with the ALK5 inhibitors Repsox, A83-01, Vactosertib, and  
288 reprogramming at day 4 (Fig. 5a). Notably, gene expression changes induced by the 4 inhibitors  
289 shared a positive correlation with gene expression changes induced by reprogramming (Fig. 5b).  
290 The strongest correlation was observed between the three ALK5 inhibitors and D4 reprogramming  
291 (Fig. 5b, S5b). Interestingly, A83-01 was the closest in transcriptomic profile to day 4  
292 reprogramming while Repsox was the closest to D4 enhanced reprogramming (Fig. 5b, S5b). The  
293 top GO terms that were significantly downregulated with either reprogramming or the TGFb  
294 inhibitors include external encapsulating structure organization, extracellular matrix organization,  
295 extracellular structure organization, collagen fibril organization, skeletal system development and  
296 protein hydroxylation (Fig. 5d). The most significantly upregulated GO terms shared by both D4  
297 reprogramming and TGFb inhibition include steroid biosynthetic process, regulation. of steroid  
298 biosynthetic process, alcohol biosynthetic process, organic hydroxyl compound metabolic process,  
299 epidermal cell differentiation, and alcohol metabolic process (Fig. 5d). Reactome analysis of  
300 shared processes between reprogramming and Repsox, A83-01, and Vactosertib showed  
301 upregulation of complement cascade and downregulation of collagen formation and ECM  
302 organization (Fig. 5e).

303



304 Interestingly, significant differences were noted when comparing the transcriptomic effects of  
305 reprogramming vs TGFb inhibition on DNA repair processes even though both improved the DNA  
306 damage phenotype. Specifically, TGFb inhibition significantly downregulated multiple DNA repair  
307 processes in Ercc1 fibroblasts including AltEJ, NHEJ, and HR among others while reprogramming  
308 significantly upregulated them (Fig. S5a 3b). At the same time, only DMH-1 matched  
309 reprogramming by significantly upregulating NER, while Repsox and Vactosertib showed a trend  
310 towards improvement (Fig. s5a). In sum, this transcriptomic data demonstrates that TGFb inhibition  
311 and initiation phase reprogramming share a strong correlation in changes to gene expression. At  
312 the same time, reprogramming induces a more robust effect, especially on DNA repair processes  
313 in our reprogrammable Ercc1 aging model.

314

## 315 **Discussion**

316 Although the age ameliorating effects of in vivo partial reprogramming have been well documented,  
317 the mechanistic drivers of rejuvenation by reprogramming are currently lacking<sup>18</sup>. Interestingly, the  
318 robust alterations to biological processes that occurs during the initiation phase of cellular  
319 reprogramming including proliferation, chromatin modification, DNA damage repair, MET, and  
320 RNA processing are well characterized and could potentially represent mechanistic drivers of  
321 longevity<sup>41–45,48</sup>. For these reasons, we investigated the relationship between these early  
322 reprogramming induced changes and their impact on aging phenotypes. Specifically, we  
323 developed a reprogrammable DNA damage model of accelerated aging,  $Ercc1^{\Delta/-} 4Fj^{+/-} rtTA^{+/-}$ , in  
324 order to test the impact of initiation phase reprogramming on a key driver of aging, genomic  
325 instability. As OSKM inhibits TGFb signaling and drives the MET during initiation phase  
326 reprogramming, we investigated the mechanistic basis of rejuvenation via cellular reprogramming  
327 by comparing it to TGFb inhibition<sup>46</sup>. Due to the slow, stochastic, and asynchronous  
328 reprogramming process which confounds molecular studies in bulk cultures we also utilized a  
329 previously defined enhanced method of cellular reprogramming by adding ascorbic acid and CHIR-  
330 99021 to the culture media<sup>53,56,57</sup>.

331

332 Here we observed that OSKM expressing Ercc1 cells undergo robust reprogramming induced  
333 changes to morphology, nuclear size, epigenome, transcriptome, and homeostasis related DNA  
334 repair processes. Striking improvements to the DNA damage marker  $\gamma$ H2AX in our Ercc1  
335 fibroblasts with a defective repair process occurred within 2 days of pluripotency factor expression.  
336 At the same time, the elevated heterochromatin markers H3K9me3 and H4K20me3 were  
337 significantly restored following enhanced reprogramming for 2 and 4 days. Most notably, DNA  
338 methylation clock analysis shows significant rejuvenation in these Ercc1 cells after 4 days of  
339 enhanced reprogramming. RNA sequencing analysis of the transcriptome showed several GO  
340 processes were upregulated significantly including DNA repair, chromatin organization, and mitotic  
341 cell cycle. This is consistent with pluripotency transcription factors being upstream of DNA repair

342 processes, particularly DNA double-strand break repair that repairs damage marked by  $\gamma$ H2AX<sup>76</sup>.  
343 Simultaneously, TGF $\beta$  signaling and EMT processes were significantly downregulated.

344

345 As TGF $\beta$  signaling is a driver of many aging phenotypes, we further investigated the importance  
346 of this signaling pathway to reprogramming induced rejuvenation via inhibition of the TGF $\beta$   
347 receptor ALK5 or the BMP receptor ALK 2<sup>67,70</sup>. Interestingly, nearly every TGF $\beta$  inhibitor tested  
348 significantly decreased  $\gamma$ H2AX levels in Ercc1 fibroblasts. The ALK5 inhibitors showed a more  
349 robust impact than ALK2 inhibitors on  $\gamma$ H2AX levels while also decreasing nuclear size, a common  
350 phenotype observed during reprogramming. Importantly, rejuvenation of the epigenetic clock was  
351 observed following treatment with 3 of 4 TGF $\beta$  inhibitors in this accelerated aging model. At the  
352 same time, RNA analysis showed a strong correlation between TGF $\beta$  inhibition and  
353 reprogramming based on similar changes to hundreds of DEGs. Interestingly, the robust changes  
354 to DNA repair based on GO pathway analysis was unique to OSKM expression. Previous work  
355 has shown that activation of the TGF $\beta$  pathway promotes genomic instability and induces HR  
356 defects while inhibition reduces DNA damage, senescence, and aging phenotypes<sup>67,74,77,78</sup>.  
357 Interestingly, TGF $\beta$  inhibition has a disruptive effect on many DNA repair processes while  
358 selectively promoting others in a cell type specific manner similar to our observations<sup>65,75</sup>.

359

360 Although initiation phase reprogramming in wildtype and Ercc1 fibroblasts was capable of  
361 ameliorating the DNA damage marker  $\gamma$ H2AX, the scale of effect was far more robust in the DNA  
362 damage model as demonstrated by significant increases in all major DNA repair processes. This  
363 data suggests that cellular reprogramming is sensitive to intrinsic cell state cues and drives a  
364 restoration of homeostatic function and youthful molecular phenotypes. Similarly, in vivo partial  
365 reprogramming studies show a more robust improvement to lifespan in progeria models indicating  
366 an ability to respond to deleterious cell states<sup>23,25</sup>. Previously, it was shown improved DNA repair  
367 via overexpression of the HR protein Rad51 enhances reprogramming efficiency<sup>79</sup>. In our 4F Ercc1  
368 fibroblasts, we observed the most significant reprogramming-induced rejuvenation coincided with  
369 upregulation of multiple DNA repair pathways. Recently maturation phase transient  
370 reprogramming for 13 days was shown to reverse the epigenetic clock in aged donors by up to 30  
371 years but longer periods saw diminished benefits<sup>33</sup>. Other groups have shown a single short burst  
372 of reprogramming in vivo is sufficient to ameliorate aging hallmarks and tissue-specific  
373 physiology<sup>25</sup>. The precise mechanism of rejuvenation involved is unknown although several  
374 studies, including ours, supports a mechanistic contribution from the epigenetic remodeling  
375 process<sup>6,7,32,80</sup>. Importantly, by inducing initiation phase reprogramming in an Ercc1 model with an  
376 accelerated epigenetic clock, we observed early reprogramming coincided with TGF $\beta$  inhibition,  
377 improved homeostasis, DNA repair, and epigenetic rejuvenation. Notably, attempts to replicate  
378 OSKM-induced TGF $\beta$  inhibition with small molecule inhibitors phenocopied improvements to the  
379 epigenetic clock in this Ercc1 model while decreasing the DNA damage marker  $\gamma$ H2AX.

380 Transcriptomic comparisons between cellular reprogramming and TGFb inhibitors of the ALK5 and  
381 ALK2 receptors were positively correlated and shared similar changes to hundreds of DEGs. At  
382 the same time, the robust upregulation of DNA repair processes via initiation phase reprogramming  
383 compared to TGFb inhibition alone suggests a different mechanistic route to DNA damage repair.

384

385 In conclusion, delineating the specific basis of rejuvenation remains difficult and potentially  
386 confounded by the multifactorial sequence of events necessary for reprogramming to proceed .  
387 The data here supports the premise that TGFb inhibition is a mechanistic contributor to  
388 rejuvenation induced by cellular reprogramming. This work sets the stage for further mechanistic  
389 investigations into the early events of reprogramming to better understand the associated drivers  
390 of rejuvenated phenotypes.

391

#### 392 **Conflict of interest**

393 S.H. is the founder of the non-profit Epigenetic Clock Development Foundation that licenses  
394 patents from his former employer UC Regents, and he is listed as the inventor. The remaining  
395 authors declare no conflicts of interest.

396

#### 397 **Author contributions**

398 A.O. and P.T.P. designed the study. A.O., A.H., R.B., S.H. and P.T.P. were involved in all  
399 experiments, data collection, analysis and interpretation. A.P and P.T.P generated the mice  
400 strains. P.T.P. and C.R. prepared the figures. C.M. performed skin fibroblast extractions. C.R.,  
401 F.M., A.S., V.G. and P.T.P. prepared and analyzed RNA-seq data. A.O., P.T.P., and G.M. provided  
402 guidance. P.T.P wrote the manuscript with input from authors.

403

#### 404 **Data availability statement**

405 The data can be made available from the corresponding author upon request.

406 The mammalian methylation array is from the nonprofit Epigenetic Clock Development Foundation  
407 (<https://clockfoundation.org/>).

408

#### 409 **Code availability statement**

410 The RNA-seq analysis code is available at [https://github.com/cheyennerechsteiner/Ercc1-](https://github.com/cheyennerechsteiner/Ercc1-Reprogramming)  
411 [Reprogramming](https://github.com/cheyennerechsteiner/Ercc1-Reprogramming).

412

#### 413 **Methods**

##### 414 **Animal housing**

415 These experiments were performed in accordance with Swiss legislation and after approval from  
416 the local authorities (Cantonal veterinary office, Canton de Vaud, Switzerland). Mice were housed  
417 in groups of five per cage or less with a 12hr light/dark cycle between 06:00 and 18:00 in a

418 temperature-controlled environment at 25°C and humidity between 40 % and 70 %, with access to  
419 water and food. Wild type, premature aging, and programmable mouse models generated were  
420 housed together in the Animal Facilities of Epalinges and Department of Biomedical Science of  
421 the University of Lausanne.

422

### 423 **Mouse strains**

424 *Ercc1<sup>Δ/-</sup>* mice and littermate controls *Ercc1<sup>+/+</sup>* were generated in a C57BL6J|FVB hybrid  
425 background as previously generated and described by de Waard<sup>13</sup>. Reprogrammable *4Fj<sup>+/-</sup> rtTA<sup>+/-</sup>*  
426 *Ercc1<sup>Δ/-</sup>* (4F.D/KO) and *4Fj<sup>+/-</sup> rtTA<sup>+/-</sup> Ercc1<sup>+/+</sup>* (4F.WT) mice strains were generated in a  
427 C57BL6J|FVB hybrid background following crosses with the previously described 4Fj mouse  
428 developed by Rudolf Jaenisch<sup>82</sup>. Previously described wildtype reprogrammable cells with an  
429 Oct4-EGFP reporter were derived from mice carrying a polycistronic cassette containing Oct4,  
430 Sox2, Klf4, c-Myc, and a single allele EGFP in the *Col1a1* locus (OKSM)<sup>83</sup>.

431

### 432 **Mouse monitoring and euthanasia**

433 All mice were monitored three times per week for their activity, posture, alertness, body weight,  
434 presence of tumors or wound, and surface temperature. Males and females were euthanized at by  
435 CO<sub>2</sub> inhalation (6 min, flow rate 20% volume/min). Subsequently, tail tip fibroblasts were harvested  
436 and cultured.

437

### 438 **Cell culture and maintenance**

439 Tail tip fibroblasts (TTF) were extracted from mice using Collagenase I (Sigma, C0130) and  
440 Dispase II (Sigma, D4693) and cultured in DMEM (Gibco, 11960085) containing 1% non-essential  
441 amino acids (Gibco, 11140035), 1% GlutaMax (Gibco, 35050061), 1% Sodium Pyruvate (Gibco,  
442 11360039) and 10% fetal bovine serum (FBS, Hyclone, SH30088.03) at 37°C in hypoxic conditions  
443 (3% O<sub>2</sub>). Subsequently, fibroblasts were cultured and passaged (3 or less) according to standard  
444 protocols. Reprogrammable TTF cells used in experiments were from young mice, including *4Fj<sup>+/-</sup>*  
445 *rtTA<sup>+/-</sup> Ercc1<sup>Δ/-</sup>* and *4Fj<sup>+/-</sup> rtTA<sup>+/-</sup> Ercc1<sup>+/+</sup>* (8 week old male), and *4FJ<sup>+/-</sup> OCT4-GFP TTF* (22 week  
446 old female). Non-reprogramming *Ercc1* TTF used include *Ercc1<sup>Δ/-</sup>* and *Ercc1<sup>+/+</sup>* (8 week old male)  
447 Experiments for TGFb inhibitors used *Ercc1<sup>Δ/-</sup>* cells (4 week old female) and *Ercc1<sup>+/+</sup>* TTF cells (14  
448 week old female). Induction of the OSKM reprogramming factors in vitro followed treatment with  
449 doxycycline 2ug/ml in culture media for the specified time points. Enhanced reprogramming  
450 followed the same protocols but added fresh ascorbic acid (50ug/ml) and CHIR-99201 (3uM) as  
451 previously reported<sup>53</sup>.

452

### 453 **Immunofluorescence staining**

454 Following experiments in 96 well plates or 24 well plates, TTF were washed with fresh PBS and  
455 fixed with 4% paraformaldehyde (Roth, 0964.1) in PBS at room temperature (RT) for 15 minutes.

456 Then cells were washed 3 more times, followed by blocking and permeabilization step in 1% bovine  
457 serum albumin (Sigma, A9647-50G) in PBST (0.2% Triton X-100 in PBS) for 1 hour (Roth, 3051.3).  
458 TTF were then incubated at 4°C overnight with a primary antibody, washed in PBS, followed by  
459 incubation with a secondary antibody and DAPI staining at room temp. for 1 hour. If performed in  
460 24 well plates, coverslips were used and mounted with Fluoromount-G (Thermofisher, 00-4958-  
461 02), dried at RT in the dark, and stored at 4°C until ready to image or -20°C for long-term.

462

### 463 **Immunofluorescence imaging**

464 Confocal image acquisition was performed using the NIKON Ti2 Yokogawa CSU-W1 Spinning  
465 Disk, using the 100X objective and with 15 z-sections of 0.3 µm intervals. Lasers for each antibody  
466 were selected (405 nm and 488 nm) with a typical laser intensity set. Exposure time and binning  
467 were established separately to assure avoidance of signal saturation.

468

### 469 **Antibodies and compounds**

470 Antibodies include: Abcam: anti-H3K27me3 (ab192985); Cell Signaling: anti-H3K9me3 (13969),  
471 anti-H4K20me3, anti-γH2AX (9718); Roth: DAPI (6843.1) Compounds include: Cayman; Valproic  
472 Acid (13033), CHIR99021 (13122), Repsox (14794), Forskolin (11018), Doxorubicin (15007);  
473 Acros Organics: TCP (130472500); APExBIO: DZNep (A8182); Seleckchem: TTNPB (S4627);  
474 Roth: X-beta-Gal (2315.3), Ascorbic Acid (Sigma).

475

### 476 **Flow cytometry**

477 Cells were stained with Thy1.2-APC and SSEA1-PE (Biolegend). Cells were fixed in BD Fixation  
478 and Permeabilization Solution. A Bechman Coulter Cytoflex S flow cytometer determined cellular  
479 subpopulation ratios.

480

### 481 **RNA sequencing, processing, analysis**

482 Total RNA and DNA was extracted from the same samples. Total RNA was extracted from cells  
483 using the Qiagen AllPrep DNA/RNA Micro Kit (New England Biolab) and protocols were followed.  
484 Total RNA concentrations were determined using the Qubit RNA BR Assay Kit (Thermofisher,  
485 Q10211).

486

487 The RNA-Seq library preparation and sequencing was done by Novogene (UK) Company Limited  
488 on an Illumina NovaSeq 6000 in 150 bp paired-end mode. Raw FASTQ files were evaluated for  
489 quality, adapter content and duplication rates with FastQC. Reads were trimmed using TrimGalore!  
490 ([https://www.bioinformatics.babraham.ac.uk/projects/trim\\_galore/](https://www.bioinformatics.babraham.ac.uk/projects/trim_galore/)) and aligned to the GRCm39  
491 mouse genome assembly using Hisat2 (<https://doi.org/10.1038/s41587-019-0201-4>). Number of  
492 reads per gene were measured using the featureCounts function in the subread package<sup>84</sup>.

493

494 All subsequent analysis was performed in R. DESeq2 was used to normalize raw read counts and  
495 perform differential gene expression analysis (doi:10.1186/s13059-014-0550-8). Ensembl gene  
496 IDs were mapped to gene symbols via the mapIds function in the AnnotationDbi package (Pagès  
497 H, Carlson M, Falcon S, Li N (2023). *AnnotationDbi: Manipulation of SQLite-based annotations in*  
498 *Bioconductor*) with an org.Mm.eg.db reference package (Carlson M (2019). *org.Mm.eg.db:*  
499 *Genome wide annotation for Mouse*). The clusterProfiler package (doi:10.1089/omi.2011.0118,  
500 doi:10.1016/j.xinn.2021.100141) was used to perform gene set enrichment analysis (GSEA) on  
501 gene ontology and Reactome terms.

502

### 503 **DNA extractions**

504 Total DNA was extracted from cells using the Qiagen AllPrep DNA/RNA Micro Kit (New England  
505 Biolab) and protocols were followed. Total DNA concentrations were determined with the Qubit  
506 DNA BR Assay (ThermoFisher, Q10211).

507

### 508 **DNA methylation clock**

509 Methylation data was generated via the HorvathMammalMethylChip<sup>85</sup> and normalized with the  
510 SeSaMe method<sup>86</sup>. Human methylation data were generated on the Illumina EPIC array platforms  
511 which profiles 866k cytosines. The noob normalization method was used and implemented in the  
512 R function preprocessNoob. The DNAm age was estimated using the DNAm Age Skin Final clock  
513 algorithm.<sup>87</sup>

514

### 515 **MTS cell proliferation assay**

516 Cell viability was performed with Tetrazolium MTS assay. Cells were cultured for 1 day in 96-well  
517 plates and treated with small molecules for 3 consecutive days prior to incubation with 120 µL fresh  
518 media containing 20 µL of CellTiter 96® AQueous One Solution (Promega, G3580) for 1 to 4 hours  
519 at 37°C in a humidified, 5% CO<sub>2</sub> atmosphere. The absorbance was determined at 490nm using a  
520 BioTek Epoch 2 microplate reader. The proportion of viable cells was determined as a ratio  
521 between the observed optical density (OD) compared to control OD.

522

### 523 **Quantification and statistical analysis**

524 Analysis of immunofluorescence microscopy images was performed using FIJI. Typically, 20  
525 different ROIs were imaged at 100x from each well from three experiments unless otherwise noted.  
526 Maximal projections of z-stacks were analyzed and total fluorescence intensity per cell and total  
527 nuclear area were determined.

528

529 All statistical analysis, statistical significance and n values are reported in the figure legends.  
530 Statistical analyses were performed using GraphPad Prism 9.0.0.

531

532 **References**

533

534 1. Rando, T. A. & Chang, H. Y. Aging, Rejuvenation, and Epigenetic Reprogramming: Resetting  
535 the Aging Clock. *Cell* **148**, 46–57 (2012).

536 2. Kennedy, B. K. *et al.* Geroscience: Linking Aging to Chronic Disease. *Cell* **159**, 709–713  
537 (2014).

538 3. López-Otín, C., Blasco, M. A., Partridge, L., Serrano, M. & Kroemer, G. The Hallmarks of  
539 Aging. *Cell* **153**, 1194–1217 (2013).

540 4. Schumacher, B., Pothof, J., Vijg, J. & Hoeijmakers, J. H. J. The central role of DNA damage in  
541 the ageing process. *Nature* **592**, 695–703 (2021).

542 5. Niedernhofer, L. J. *et al.* Nuclear Genomic Instability and Aging. *Annu. Rev. Biochem.* **87**,  
543 295–322 (2018).

544 6. Yang, J.-H. *et al.* Loss of epigenetic information as a cause of mammalian aging. *Cell* **186**,  
545 305-326.e27 (2023).

546 7. Kane, A. E. & Sinclair, D. A. Epigenetic changes during aging and their reprogramming  
547 potential. *Crit. Rev. Biochem. Mol. Biol.* **54**, 61–83 (2019).

548 8. Tubbs, A. & Nussenzweig, A. Endogenous DNA Damage as a Source of Genomic Instability  
549 in Cancer. *Cell* **168**, 644–656 (2017).

550 9. Vermeij, W. P. *et al.* Restricted diet delays accelerated ageing and genomic stress in DNA-  
551 repair-deficient mice. *Nature* **537**, 427–431 (2016).

552 10. Li, W. *et al.* Nucleotide excision repair capacity increases during differentiation of human  
553 embryonic carcinoma cells into neurons and muscle cells. *J. Biol. Chem.* **294**, 5914–5922  
554 (2019).

555 11. Weeda, G. *et al.* Disruption of mouse ERCC1 results in a novel repair syndrome with growth  
556 failure, nuclear abnormalities and senescence. *Curr. Biol.* **7**, 427–439 (1997).

557 12. Dollé, M. E. T. *et al.* Increased genomic instability is not a prerequisite for shortened lifespan  
558 in DNA repair deficient mice. *Mutat. Res. Mol. Mech. Mutagen.* **596**, 22–35 (2006).

559 13. de Waard, M. C. *et al.* Age-related motor neuron degeneration in DNA repair-deficient Ercc1  
560 mice. *Acta Neuropathol. (Berl.)* **120**, 461–475 (2010).

- 561 14. Tian, X. *et al.* SIRT6 Is Responsible for More Efficient DNA Double-Strand Break Repair in  
562 Long-Lived Species. *Cell* **177**, 622-638.e22 (2019).
- 563 15. Takayama, K. *et al.* mTOR signaling plays a critical role in the defects observed in muscle-  
564 derived stem/progenitor cells isolated from a murine model of accelerated aging. *J. Orthop.*  
565 *Res.* **35**, 1375–1382 (2017).
- 566 16. Birkisdóttir, M. B. *et al.* Unlike dietary restriction, rapamycin fails to extend lifespan and  
567 reduce transcription stress in progeroid DNA repair-deficient mice. *Aging Cell* **20**, e13302  
568 (2021).
- 569 17. Takahashi, K. & Yamanaka, S. Induction of Pluripotent Stem Cells from Mouse Embryonic  
570 and Adult Fibroblast Cultures by Defined Factors. *Cell* **126**, 663–676 (2006).
- 571 18. Singh, P. B. & Newman, A. G. Age reprogramming and epigenetic rejuvenation. *Epigenetics*  
572 *Chromatin* **11**, 73 (2018).
- 573 19. Lapasset, L. *et al.* Rejuvenating senescent and centenarian human cells by reprogramming  
574 through the pluripotent state. *Genes Dev.* **25**, 2248–2253 (2011).
- 575 20. Mahmoudi, S., Xu, L. & Brunet, A. Turning back time with emerging rejuvenation strategies.  
576 *Nat. Cell Biol.* **21**, 32–43 (2019).
- 577 21. de Magalhães, J. P. & Ocampo, A. Cellular reprogramming and the rise of rejuvenation  
578 biotech. *Trends Biotechnol.* **40**, 639–642 (2022).
- 579 22. Alle, Q., Le Borgne, E., Milhavet, O. & Lemaitre, J.-M. Reprogramming: Emerging Strategies  
580 to Rejuvenate Aging Cells and Tissues. *Int. J. Mol. Sci.* **22**, 3990 (2021).
- 581 23. Ocampo, A. *et al.* In Vivo Amelioration of Age-Associated Hallmarks by Partial  
582 Reprogramming. *Cell* **167**, 1719-1733.e12 (2016).
- 583 24. Macip, C. C. *et al.* Gene Therapy Mediated Partial Reprogramming Extends Lifespan and  
584 Reverses Age-Related Changes in Aged Mice. 2023.01.04.522507 Preprint at  
585 <https://doi.org/10.1101/2023.01.04.522507> (2023).
- 586 25. Alle, Q. *et al.* A single short reprogramming early in life initiates and propagates an  
587 epigenetically related mechanism improving fitness and promoting an increased healthy  
588 lifespan. *Aging Cell* **21**, e13714 (2022).



- 589 26. Sarkar, T. J. *et al.* Transient non-integrative expression of nuclear reprogramming factors  
590 promotes multifaceted amelioration of aging in human cells. *Nat. Commun.* **11**, 1545 (2020).
- 591 27. de Lázaro, I. *et al.* Non-viral, Tumor-free Induction of Transient Cell Reprogramming in  
592 Mouse Skeletal Muscle to Enhance Tissue Regeneration. *Mol. Ther.* **27**, 59–75 (2019).
- 593 28. Wang, C. *et al.* In vivo partial reprogramming of myofibers promotes muscle regeneration by  
594 remodeling the stem cell niche. *Nat. Commun.* **12**, 3094 (2021).
- 595 29. Browder, K. C. *et al.* In vivo partial reprogramming alters age-associated molecular changes  
596 during physiological aging in mice. *Nat. Aging* **2**, 243–253 (2022).
- 597 30. Chen, Y. *et al.* Reversible reprogramming of cardiomyocytes to a fetal state drives heart  
598 regeneration in mice. *Science* **373**, 1537–1540 (2021).
- 599 31. Cheng, F. *et al.* Partial reprogramming strategy for intervertebral disc rejuvenation by  
600 activating energy switch. *Aging Cell* **21**, e13577 (2022).
- 601 32. Lu, Y. *et al.* Reprogramming to recover youthful epigenetic information and restore vision.  
602 *Nature* **588**, 124–129 (2020).
- 603 33. Gill, D. *et al.* Multi-omic rejuvenation of human cells by maturation phase transient  
604 reprogramming. *eLife* **11**, e71624 (2022).
- 605 34. Chondronasiou, D. *et al.* Multi-omic rejuvenation of naturally aged tissues by a single cycle of  
606 transient reprogramming. *Aging Cell* **21**, e13578 (2022).
- 607 35. Maherali, N. *et al.* Directly Reprogrammed Fibroblasts Show Global Epigenetic Remodeling  
608 and Widespread Tissue Contribution. *Cell Stem Cell* **1**, 55–70 (2007).
- 609 36. Mikkelsen, T. S. *et al.* Dissecting direct reprogramming through integrative genomic analysis.  
610 *Nature* **454**, 49–55 (2008).
- 611 37. Brambrink, T. *et al.* Sequential Expression of Pluripotency Markers during Direct  
612 Reprogramming of Mouse Somatic Cells. *Cell Stem Cell* **2**, 151–159 (2008).
- 613 38. Plath, K. & Lowry, W. E. Progress in understanding reprogramming to the induced  
614 pluripotent state. *Nat. Rev. Genet.* **12**, 253–265 (2011).
- 615 39. Stadtfeld, M., Maherali, N., Breault, D. T. & Hochedlinger, K. Defining Molecular  
616 Cornerstones during Fibroblast to iPS Cell Reprogramming in Mouse. *Cell Stem Cell* **2**, 230–  
617 240 (2008).

- 618 40. Li, R. *et al.* A Mesenchymal-to-Epithelial Transition Initiates and Is Required for the Nuclear  
619 Reprogramming of Mouse Fibroblasts. *Cell Stem Cell* **7**, 51–63 (2010).
- 620 41. Samavarchi-Tehrani, P. *et al.* Functional Genomics Reveals a BMP-Driven Mesenchymal-to-  
621 Epithelial Transition in the Initiation of Somatic Cell Reprogramming. *Cell Stem Cell* **7**, 64–77  
622 (2010).
- 623 42. Polo, J. M. *et al.* A Molecular Roadmap of Reprogramming Somatic Cells into iPS Cells. *Cell*  
624 **151**, 1617–1632 (2012).
- 625 43. Buganim, Y. *et al.* Single-Cell Expression Analyses during Cellular Reprogramming Reveal  
626 an Early Stochastic and a Late Hierarchic Phase. *Cell* **150**, 1209–1222 (2012).
- 627 44. Benevento, M. *et al.* Proteome adaptation in cell reprogramming proceeds via distinct  
628 transcriptional networks. *Nat. Commun.* **5**, 5613 (2014).
- 629 45. Hansson, J. *et al.* Highly Coordinated Proteome Dynamics during Reprogramming of  
630 Somatic Cells to Pluripotency. *Cell Rep.* **2**, 1579–1592 (2012).
- 631 46. David, L. & Polo, J. M. Phases of reprogramming. *Stem Cell Res.* **12**, 754–761 (2014).
- 632 47. Kuno, A., Nishimura, K. & Takahashi, S. Time-course transcriptome analysis of human  
633 cellular reprogramming from multiple cell types reveals the drastic change occurs between  
634 the mid phase and the late phase. *BMC Genomics* **19**, 9 (2018).
- 635 48. Koche, R. P. *et al.* Reprogramming Factor Expression Initiates Widespread Targeted  
636 Chromatin Remodeling. *Cell Stem Cell* **8**, 96–105 (2011).
- 637 49. Roux, A. E. *et al.* Diverse partial reprogramming strategies restore youthful gene expression  
638 and transiently suppress cell identity. *Cell Syst.* **13**, 574-587.e11 (2022).
- 639 50. Mahmoudi, S. *et al.* Heterogeneity in old fibroblasts is linked to variability in reprogramming  
640 and wound healing. *Nature* **574**, 553–558 (2019).
- 641 51. Ebrahimi, B. Reprogramming barriers and enhancers: strategies to enhance the efficiency  
642 and kinetics of induced pluripotency. *Cell Regen.* **4**, 10 (2015).
- 643 52. Stadtfeld, M. & Hochedlinger, K. Induced pluripotency: history, mechanisms, and  
644 applications. *Genes Dev.* **24**, 2239–2263 (2010).
- 645 53. Bar-Nur, O. *et al.* Small molecules facilitate rapid and synchronous iPSC generation. *Nat.*  
646 *Methods* **11**, 1170–1176 (2014).

- 647 54. Vidal, S. E., Amlani, B., Chen, T., Tsigirgos, A. & Stadtfeld, M. Combinatorial Modulation of  
648 Signaling Pathways Reveals Cell-Type-Specific Requirements for Highly Efficient and  
649 Synchronous iPSC Reprogramming. *Stem Cell Rep.* **3**, 574–584 (2014).
- 650 55. Chen, J. *et al.* Rational optimization of reprogramming culture conditions for the generation  
651 of induced pluripotent stem cells with ultra-high efficiency and fast kinetics. *Cell Res.* **21**,  
652 884–894 (2011).
- 653 56. Li, W. *et al.* Generation of Human-Induced Pluripotent Stem Cells in the Absence of  
654 Exogenous Sox2. *Stem Cells* **27**, 2992–3000 (2009).
- 655 57. Liu, X. *et al.* Ascorbic Acid in Epigenetic Reprogramming. *Curr. Stem Cell Res. Ther.* **17**, 13–  
656 25 (2022).
- 657 58. Esteban, M. A. *et al.* Vitamin C Enhances the Generation of Mouse and Human Induced  
658 Pluripotent Stem Cells. *Cell Stem Cell* **6**, 71–79 (2010).
- 659 59. Perez, K. *et al.* ERCC1 mice, unlike other premature aging models, display accelerated  
660 epigenetic age. 2022.12.28.522011 Preprint at <https://doi.org/10.1101/2022.12.28.522011>  
661 (2022).
- 662 60. Horvath, S. DNA methylation age of human tissues and cell types. *Genome Biol.* **14**, 3156  
663 (2013).
- 664 61. Olova, N., Simpson, D. J., Marioni, R. E. & Chandra, T. Partial reprogramming induces a  
665 steady decline in epigenetic age before loss of somatic identity. *Aging Cell* **18**, e12877  
666 (2019).
- 667 62. Takata, H. *et al.* Chromatin Compaction Protects Genomic DNA from Radiation Damage.  
668 *PLoS ONE* **8**, e75622 (2013).
- 669 63. Lee, J.-H., Kim, E. W., Croteau, D. L. & Bohr, V. A. Heterochromatin: an epigenetic point of  
670 view in aging. *Exp. Mol. Med.* **52**, 1466–1474 (2020).
- 671 64. Mah, N. *et al.* Molecular Insights into Reprogramming-Initiation Events Mediated by the  
672 OSKM Gene Regulatory Network. *PLOS ONE* **6**, e24351 (2011).
- 673 65. Liu, Q. *et al.* Loss of TGF $\beta$  signaling increases alternative end-joining DNA repair that  
674 sensitizes to genotoxic therapies across cancer types. *Sci. Transl. Med.* **13**, eabc4465  
675 (2021).

- 676 66. Kim, B.-G., Malek, E., Choi, S. H., Ignatz-Hoover, J. J. & Driscoll, J. J. Novel therapies  
677 emerging in oncology to target the TGF- $\beta$  pathway. *J. Hematol. Oncol.* **14**,  
678 55 (2021).
- 679 67. Tominaga, K. & Suzuki, H. I. TGF- $\beta$  Signaling in Cellular Senescence and Aging-Related  
680 Pathology. *Int. J. Mol. Sci.* **20**, 5002 (2019).
- 681 68. Lyu, G. *et al.* TGF- $\beta$  signaling alters H4K20me3 status via miR-29 and contributes to cellular  
682 senescence and cardiac aging. *Nat. Commun.* **9**, 2560 (2018).
- 683 69. Schoenfeldt, L. *et al.* Chemical reprogramming ameliorates cellular hallmarks of aging and  
684 extends lifespan. 2022.08.29.505222 Preprint at <https://doi.org/10.1101/2022.08.29.505222>  
685 (2022).
- 686 70. Weiss, A. & Attisano, L. The TGFbeta Superfamily Signaling Pathway. *WIREs Dev. Biol.* **2**,  
687 47–63 (2013).
- 688 71. Hou, P. *et al.* Pluripotent Stem Cells Induced from Mouse Somatic Cells by Small-Molecule  
689 Compounds. *Science* **341**, 651–654 (2013).
- 690 72. Guan, J. *et al.* Chemical reprogramming of human somatic cells to pluripotent stem cells.  
691 *Nature* **605**, 325–331 (2022).
- 692 73. Liu, Q., Lopez, K., Murnane, J., Humphrey, T. & Barcellos-Hoff, M. H. Misrepair in Context:  
693 TGF $\beta$  Regulation of DNA Repair. *Front. Oncol.* **9**, (2019).
- 694 74. Pal, D. *et al.* TGF- $\beta$  reduces DNA ds-break repair mechanisms to heighten genetic diversity  
695 and adaptability of CD44+/CD24– cancer cells. *eLife* **6**, e21615 (2017).
- 696 75. Zhang, H. *et al.* TGF- $\beta$  Inhibition Rescues Hematopoietic Stem Cell Defects and Bone  
697 Marrow Failure in Fanconi Anemia. *Cell Stem Cell* **18**, 668–681 (2016).
- 698 76. Lu, J. Y. *et al.* Comparative transcriptomics reveals circadian and pluripotency networks as  
699 two pillars of longevity regulation. *Cell Metab.* **34**, 836-856.e5 (2022).
- 700 77. Kanamoto, T., Hellman, U., Heldin, C.-H. & Souchelnytskyi, S. Functional proteomics of  
701 transforming growth factor- $\beta$ 1-stimulated Mv1Lu epithelial cells: Rad51 as a target of TGF $\beta$ 1-  
702 dependent regulation of DNA repair. *EMBO J.* **21**, 1219–1230 (2002).
- 703 78. Liu, L. *et al.* TGF $\beta$  Induces “BRCAness” and Sensitivity to PARP Inhibition in Breast Cancer  
704 by Regulating DNA-Repair Genes. *Mol. Cancer Res.* **12**, 1597–1609 (2014).

- 705 79. Lee, J.-Y., Kim, D.-K., Ko, J.-J., Kim, K. P. & Park, K.-S. Rad51 Regulates Reprogramming  
706 Efficiency through DNA Repair Pathway. *Dev. Reprod.* **20**, 163–169 (2016).
- 707 80. Manukyan, M. & Singh, P. B. Epigenome rejuvenation: HP1 $\beta$  mobility as a measure of  
708 pluripotent and senescent chromatin ground states. *Sci. Rep.* **4**, 4789 (2014).
- 709 81. López-León, M., Outeiro, T. F. & Goya, R. G. Cell reprogramming: Therapeutic potential and  
710 the promise of rejuvenation for the aging brain. *Ageing Res. Rev.* **40**, 168–181 (2017).
- 711 82. Carey, B. W., Markoulaki, S., Beard, C., Hanna, J. & Jaenisch, R. Single-gene transgenic  
712 mouse strains for reprogramming adult somatic cells. *Nat. Methods* **7**, 56–59 (2010).
- 713 83. Stadtfeld, M., Maherali, N., Borkent, M. & Hochedlinger, K. A reprogrammable mouse strain  
714 from gene-targeted embryonic stem cells. *Nat. Methods* **7**, 53–55 (2010).
- 715 84. Liao, Y., Smyth, G. K. & Shi, W. The Subread aligner: fast, accurate and scalable read  
716 mapping by seed-and-vote. *Nucleic Acids Res.* **41**, e108 (2013).
- 717 85. Arneson, A. *et al.* A mammalian methylation array for profiling methylation levels at  
718 conserved sequences. *Nat. Commun.* **13**, 783 (2022).
- 719 86. Zhou, W., Triche, T. J., Jr, Laird, P. W. & Shen, H. SeSAME: reducing artifactual detection of  
720 DNA methylation by Infinium BeadChips in genomic deletions. *Nucleic Acids Res.* **46**, e123  
721 (2018).
- 722 87. Boroni, M. *et al.* Highly accurate skin-specific methylome analysis algorithm as a platform to  
723 screen and validate therapeutics for healthy aging. *Clin. Epigenetics* **12**, 105 (2020).
- 724

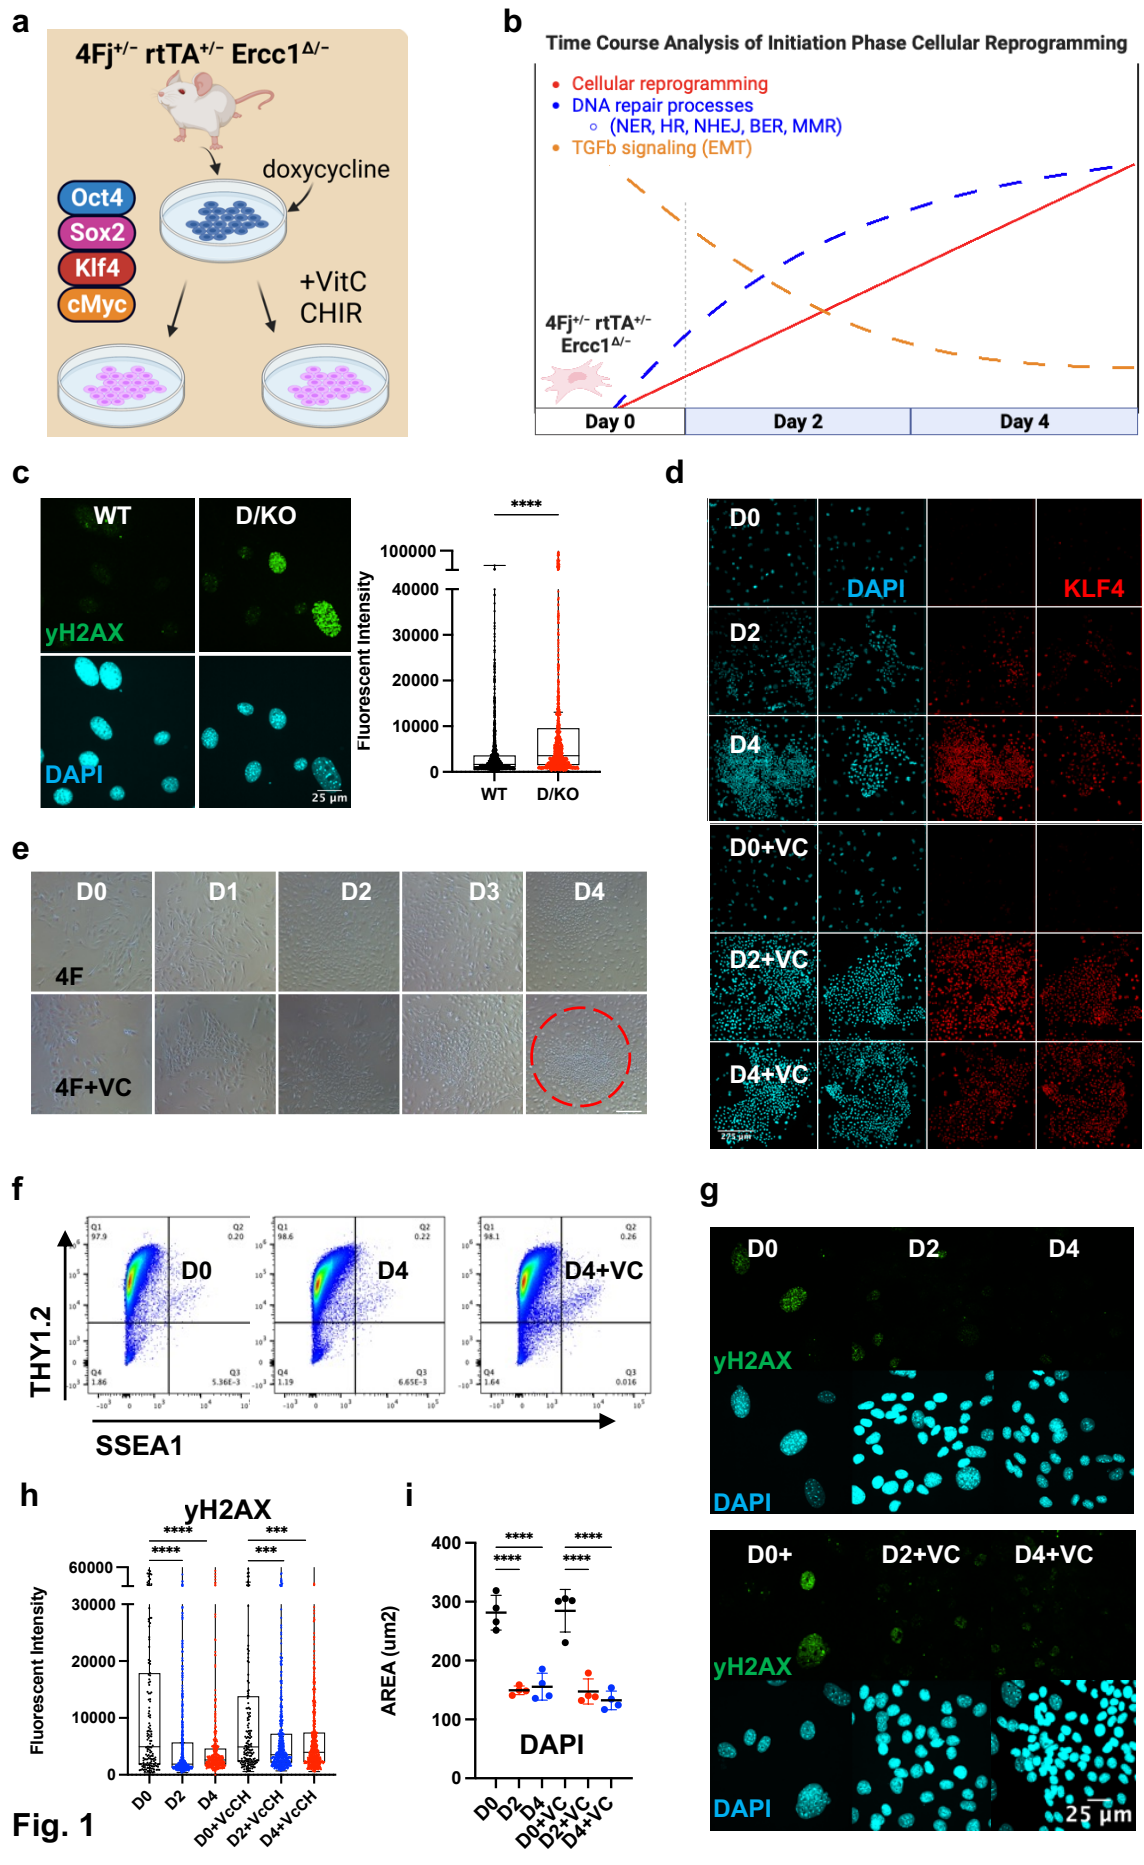

**Fig. 1**

**Figure 1: Initiation phase reprogramming in 4Fj<sup>+/-</sup> rtTA<sup>+/-</sup> Ercc1<sup>Δ/-</sup> accelerated aging model promotes DNA damage repair.**

**(a)** Illustration of doxycycline inducible cellular reprogramming Ercc1 mutant fibroblasts (Fb) alone or enhanced with small molecules. **(b)** Schematic of initiation phase timecourse analysis setup with observed changes to DNA repair and TGFb signaling. **(c)** Representative Immunofluorescence (IF) and quantification of γH2AX in fibroblasts from wildtype (WT) and Ercc1<sup>Δ/-</sup> (D/KO) mice, imaged with Nikon laser confocal spinning disc, according to Mann-Whitney test, \*\*\*\* p<0.0001. **(d)** IF of KLF4 and DAPI in 4Fj<sup>+/-</sup> rtTA<sup>+/-</sup> Ercc1<sup>Δ/-</sup> Fbs after 2 and 4 days doxycycline induction with or without VC at 100x **(e)** Time course analysis of 4F and 4F.D/KO Fb during 4 days of dox induction +/- VC, brightfield (BF) images at 4x. **(f)** FACS analysis of reprogramming FBs at day 0 and day 4, stained with Thy1.2 and SSEA1. **(g)** IF of γH2AX and DAPI during time course analysis of 4F.D/KO Fb +/-VC. **(h)** IF quantification of γH2AX levels during timecourse shows decrease levels at day 2 and day 4 according to one way ANOVA, \*\*\* p<0.001. **(i)** Quantification of DAPI area during timecourse shows decrease in size at day 2 and day 4 based on mean values of 4 experiments according to one way ANOVA, \*\*\*\* p<0.0001.

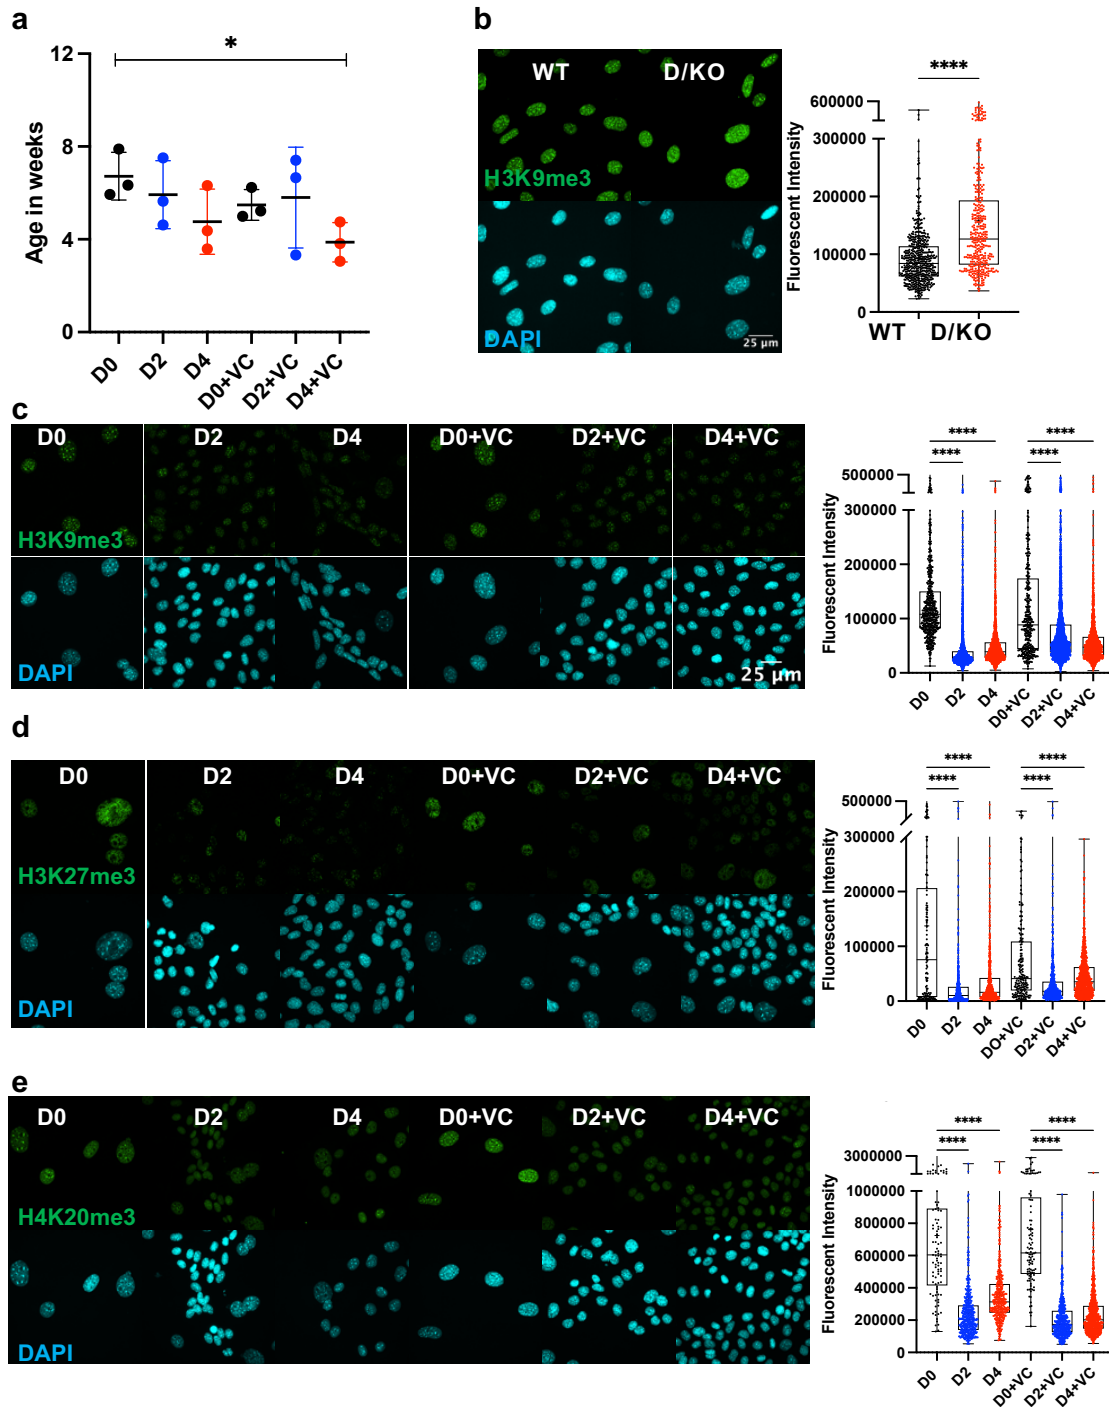

**Fig. 2**



**Figure 2: DNA methylation clock is restored in *Ercc1*<sup>Δ/-</sup> following short term reprogramming.**

**(a)** DNA methylation clock (DNA Methylation Age Skin Final clock) analysis of cellular *Ercc1* mutant Fb during time course, n = 3, \* p<0.05 according to unpaired t-test. **(b)** IF and quantification of H3K9me3 in fibroblasts from WT and D/KO mice, imaged with Nikon laser confocal spinning disc, according to Mann-Whitney test, \*\*\*\* p<0.0001. **(c)** IF and quantification of H3K9me3 and DAPI during time course in 4F.D/KO Fbs after 2 and 4 days doxycycline induction with or without VC at 100x according to Kruskal-Wallis test, \* p<0.0001 **(d)** IF and quantification of H3K27me3 and DAPI during time course in 4F.D/KO Fbs after 2 and 4 days doxycycline induction with or without VC at 100x according to Kruskal-Wallis test, \* p<0.0001 **(e)** IF and quantification of H4K20me3 and DAPI during time course in 4F.D/KO Fbs after 2 and 4 days doxycycline induction with or without VC at 100x according to Kruskal-Wallis test, \* p<0.0001.

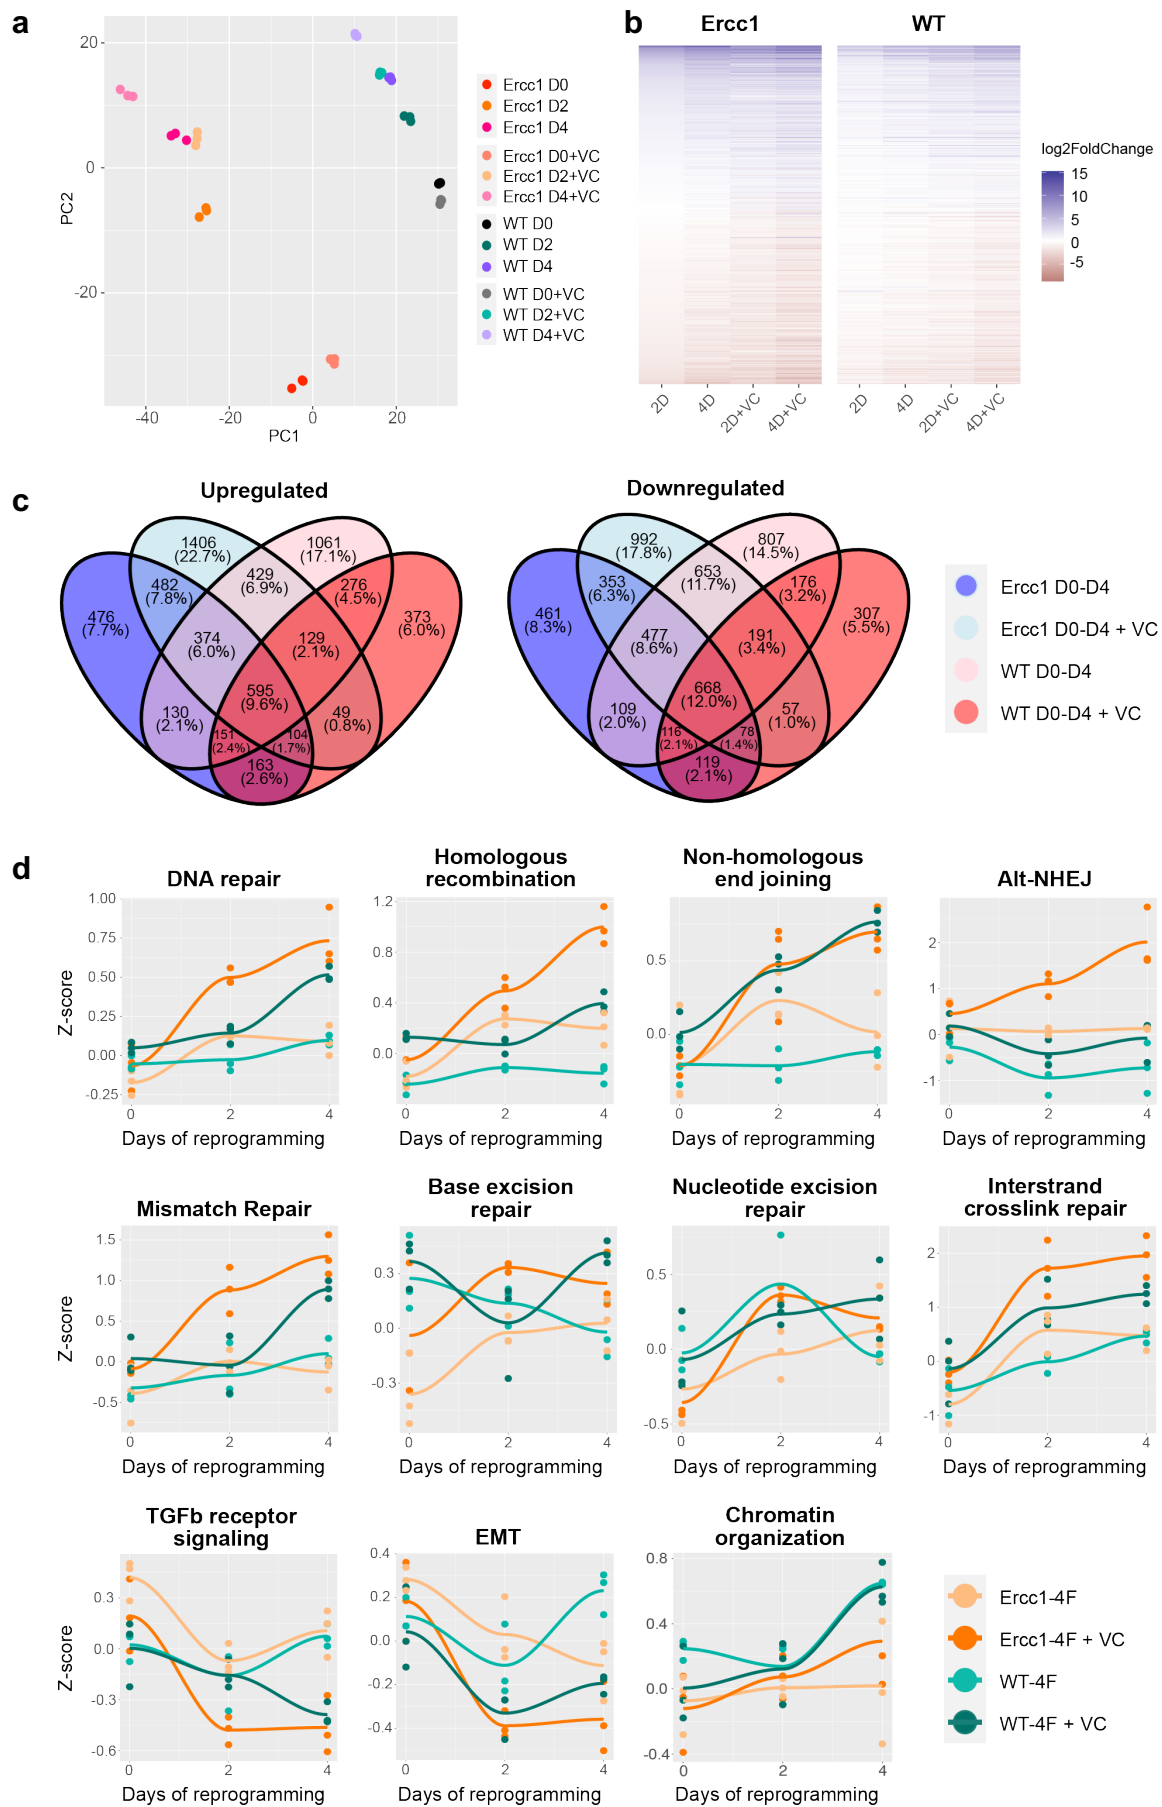

**Fig. 3**

**Figure 3: Initiation phase reprogramming drives transcriptomic reset and upregulates DNA repair and chromatin organization in *Ercc1*<sup>Δ/-</sup>**

**(a)** Principal component analysis (PCA) of the *Ercc1* and WT reprogramming at days 0, 2, and 4 with and without VC enhancement. Principal components 1 and 2 are shown. **(b)** Heat map comparing *Ercc1* and WT reprogramming at all timepoints, models, and treatments. Genes with a p-value lower than 1e-18 in at least one condition are shown. **(c)** Venn Diagram showing the overlap of significant DEGs (adjusted p-value < 0.05) in *Ercc1* and WT during IP reprogramming with and without VC enhancement. Genes were evaluated using a continuous model over 4 days of reprogramming. **(d)** Reprogramming trajectory visualizations based on median Z-scores of genes from significantly up or down regulated GO pathway including DNA repair, TGFβ signaling, EMT, and chromatin organization (n=3).

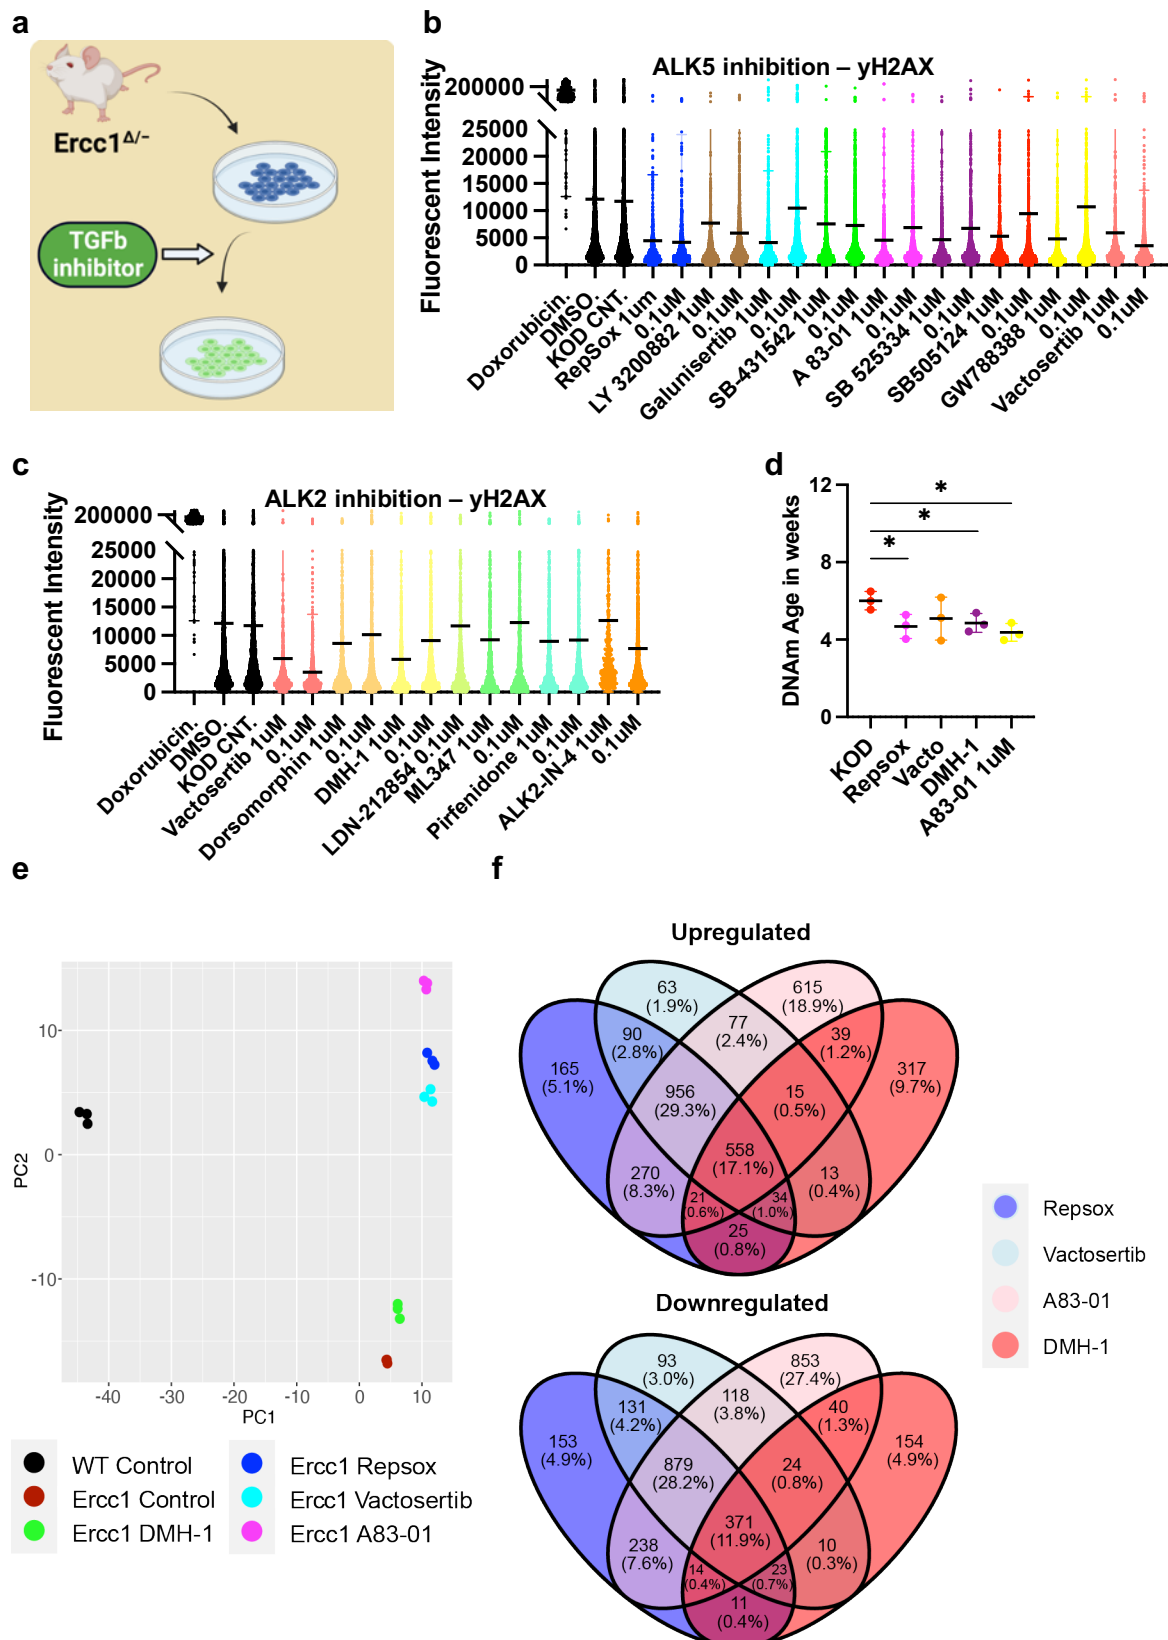

**Fig. 4**

**Figure 4: Inhibition of ALK5 or ALK2 receptors improves DNA damage phenotype and resets the DNA methylation clock and transcriptome in *Ercc1*<sup>Δ/-</sup>**

**(a)** Illustration of TGF $\beta$  inhibitor screen on D/KO Fbs. **(b)** IF quantification of  $\gamma$ H2AX mean levels in D/KO Fbs following treatment with ALK5 inhibitors, plated in 96 wells in triplicate and imaged with laser confocal at 40x. **(c)** IF quantification of  $\gamma$ H2AX mean levels in D/KO Fbs following treatment with ALK 2 inhibitors, plated in 96 wells in triplicate. **(d)** DNA methylation clock (DNA Methylation Age Skin Final clock) analysis, comparing Repsox (0.1  $\mu$ m), Vactosertib (0.1  $\mu$ m), DMH-1 (1.0  $\mu$ m), and A83-01 (1.0  $\mu$ m) on D/KO Fbs, n = 3, \* p<0.05 according to unpaired t-test. **(e)** Principal component analysis (PCA) of *Ercc1* cells treated with TGF $\beta$  inhibitors. Principal components 1 and 2 are shown. **(f)** Venn Diagram showing the overlap of significant genes (adjusted p-value < 0.05) for the TGF $\beta$  inhibitors.

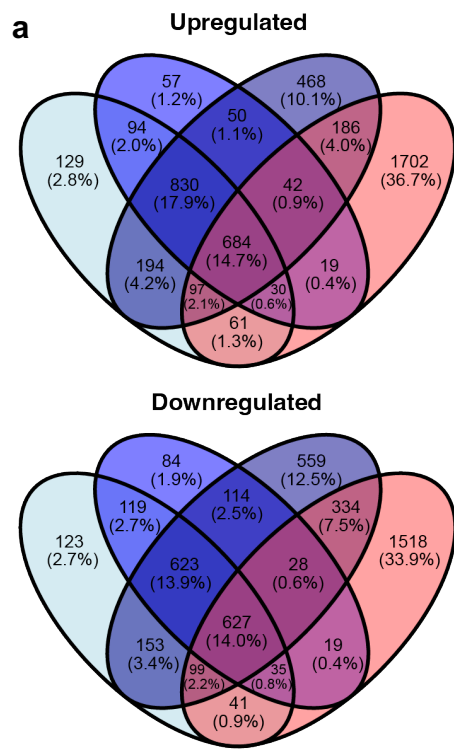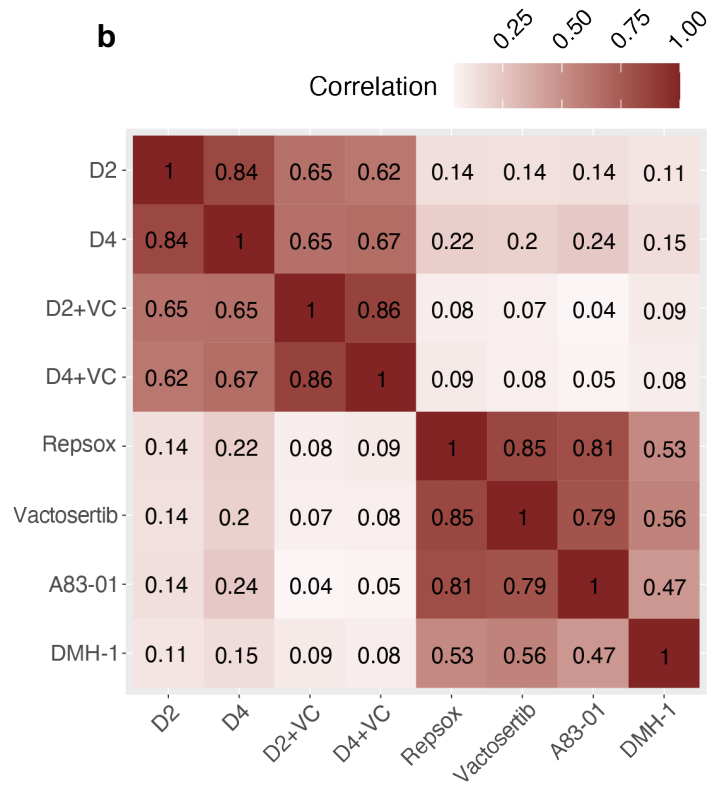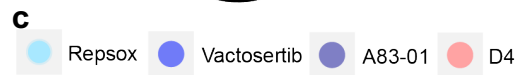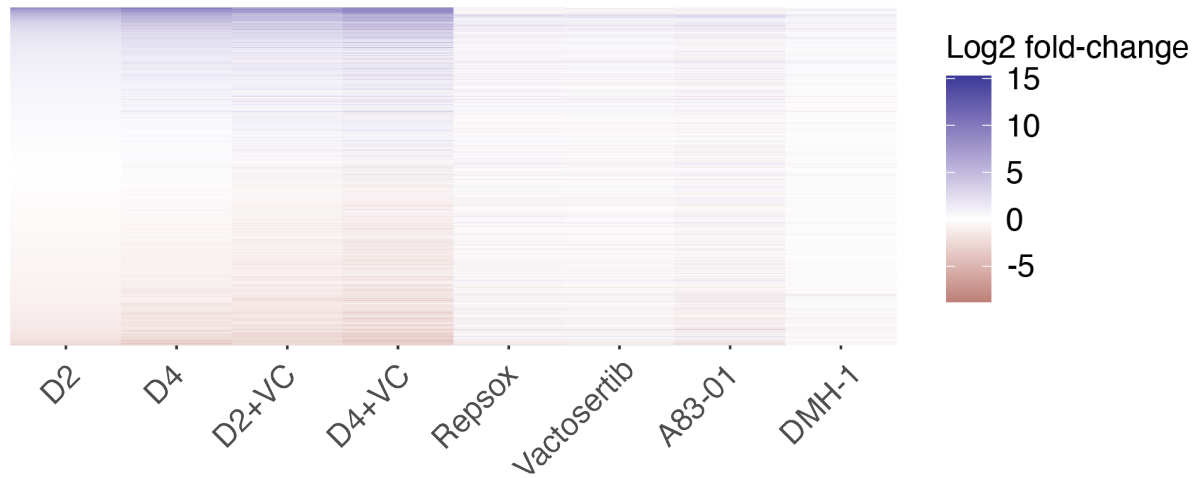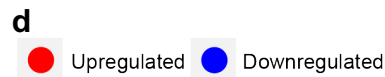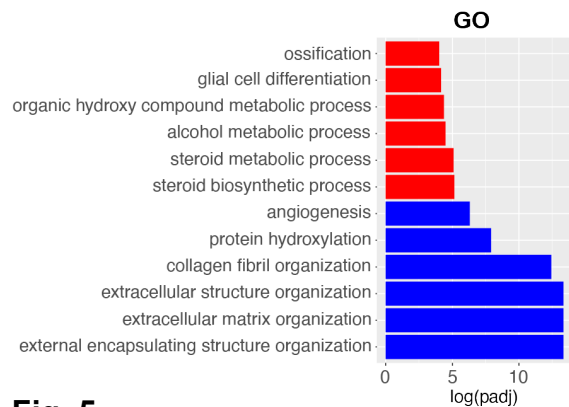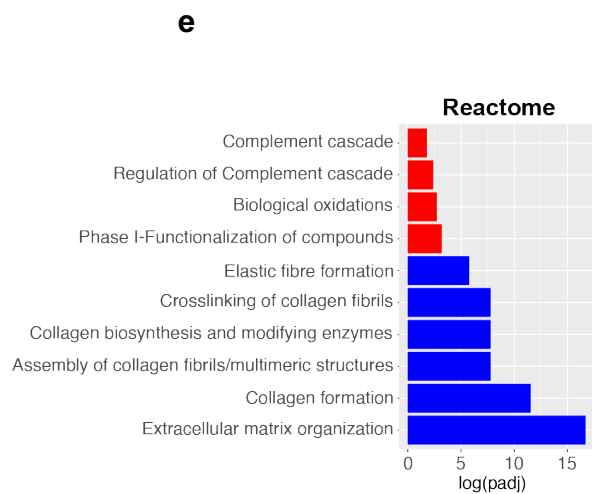

**Fig. 5**

**Figure 5: Transcriptomic comparison of Initiation phase reprogramming with TGFb inhibition in Ercc1<sup>Δ/-</sup>.** (a) Venn Diagram showing the overlap of significant genes (adjusted p-value < 0.05) for ALK5 inhibitors and 4 days of reprogramming. (b) Pairwise correlation between the log<sub>2</sub> fold-changes of the filtered gene set (n=16883) of Ercc1 reprogramming and ALK5 or ALK2 inhibitors. (c) Heat map comparing Ercc1 reprogramming with TGFb inhibitors. Genes with a p-value lower than 1e-10 in at least one condition are shown. (d and e) GO and Reactome analysis of the intersect of significant genes as evaluated in 5A. Terms with the top six upregulated (red) and downregulated (blue) assessed by log(adjusted p-value) are shown.

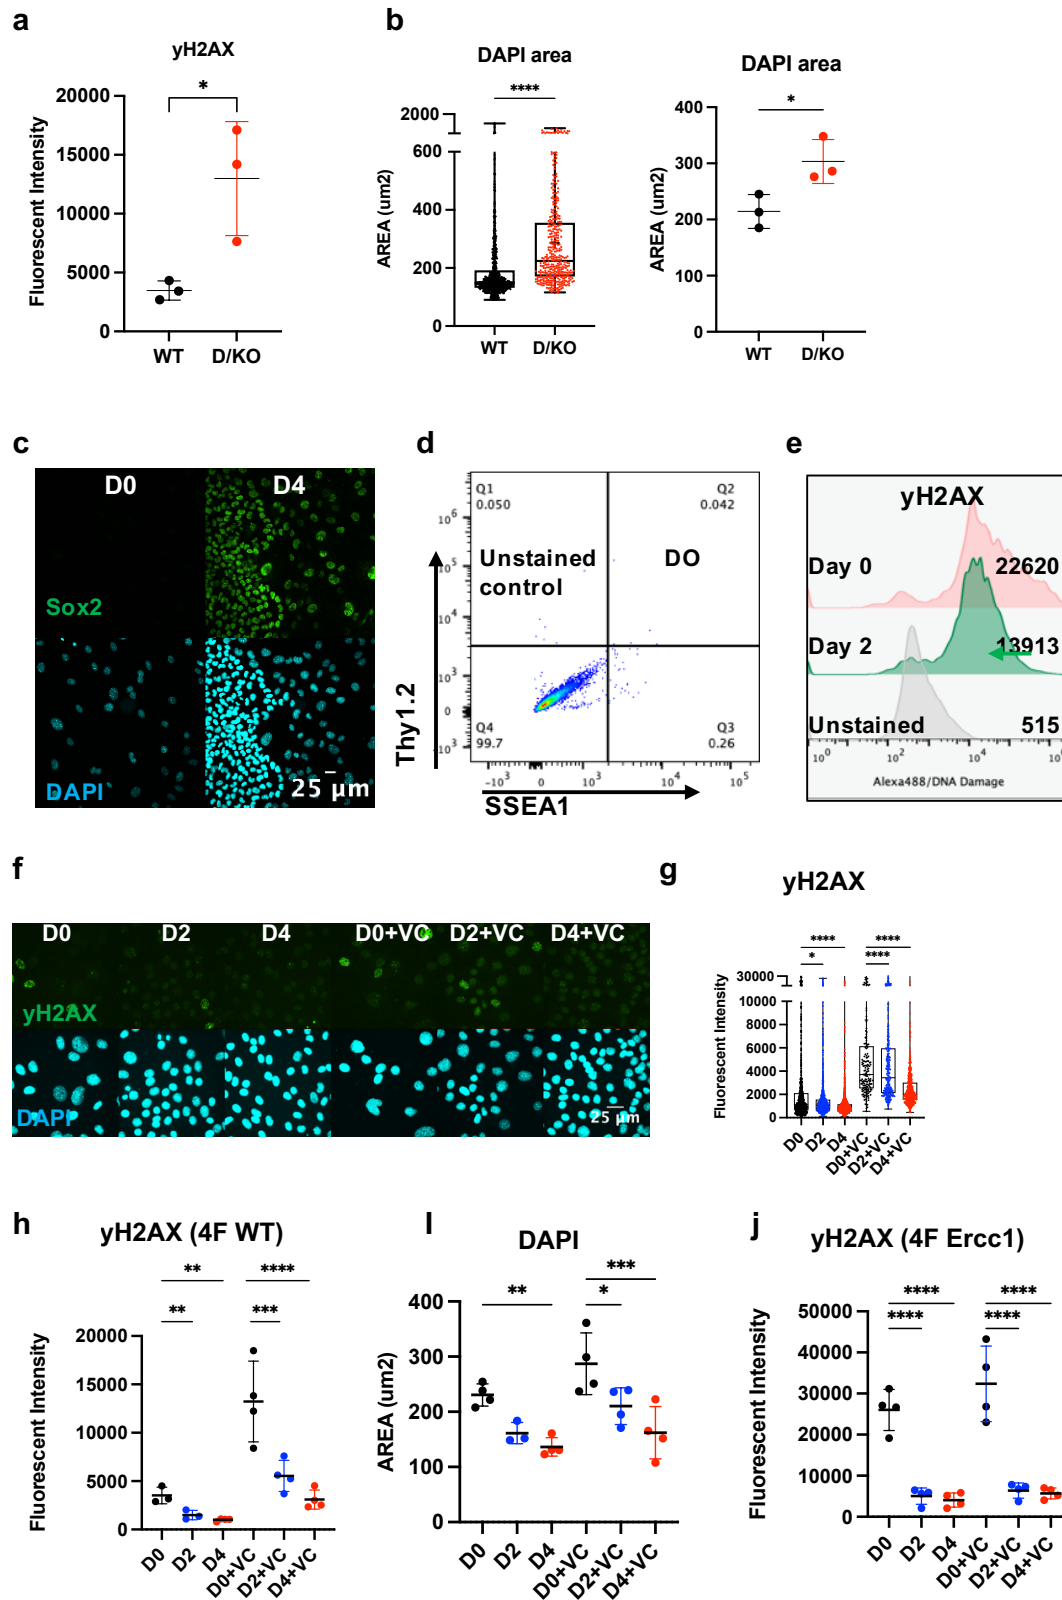

Fig. S1



**Figure S1: Initiation phase reprogramming in 4Fj<sup>+/-</sup> rtTA<sup>+/-</sup> Ercc1<sup>Δ/-</sup> accelerated aging model promotes DNA damage repair.**

**(a)** Quantification of γH2AX IF from 3 experiments in fibroblasts from wildtype (WT) and Ercc1<sup>Δ/-</sup> (D/KO) mice, imaged with Nikon laser confocal spinning disc, according to unpaired t-test, \* p<0.05. **(b)** Quantification of DAPI in fibroblasts from wildtype (WT) and Ercc1<sup>Δ/-</sup> (D/KO) mice, imaged with Nikon laser confocal spinning disc, according to Mann-Whitney test, \*\*\*\* p<0.0001. Quantification of DAPI area from 3 experiments in fibroblasts from wildtype (WT) and Ercc1<sup>Δ/-</sup> (D/KO) mice, imaged with Nikon laser confocal spinning disc, according to unpaired t-test, \* p<0.05 **(c)** IF image of Sox2 and DAPI in 4F.D/KO Fbs after 4 days doxycycline induction, 40x **(d)** FACS unstained control for analysis of reprogramming Fbs markers Thy1.2 and SSEA1. **(e)** FACS analysis γH2AX levels following reprogramming of 4F.D/KO Fbs at day 0, day 2, and unstained control. **(f)** IF images of γH2AX and DAPI during representative time course analysis of 4F.WT Fb +/-VC at 100x. **(g)** Quantification of γH2AX images during time course shows significantly decreased levels at day 2 and day 4 according to one way ANOVA, \*\*\*\* p<0.0001. **(h)** Quantification of mean γH2AX levels in 4F WT from 3 or 4 experiments during time course shows significant decrease to levels at day 2 and day 4 according to one way ANOVA, \*\* p<0.01. **(i)** Quantification of DAPI area during time course shows decrease in size at day 2 and day 4 based on mean values of 4 experiments according to one way ANOVA, \*\*\* p<0.001, \*\* p<0.01, \*p<0.05. **(j)** Quantification of mean γH2AX levels in 4F D/KO from 4 experiments during time course shows significant decrease to levels at day 2 and day 4 according to one way ANOVA, \*\* p<0.0001.

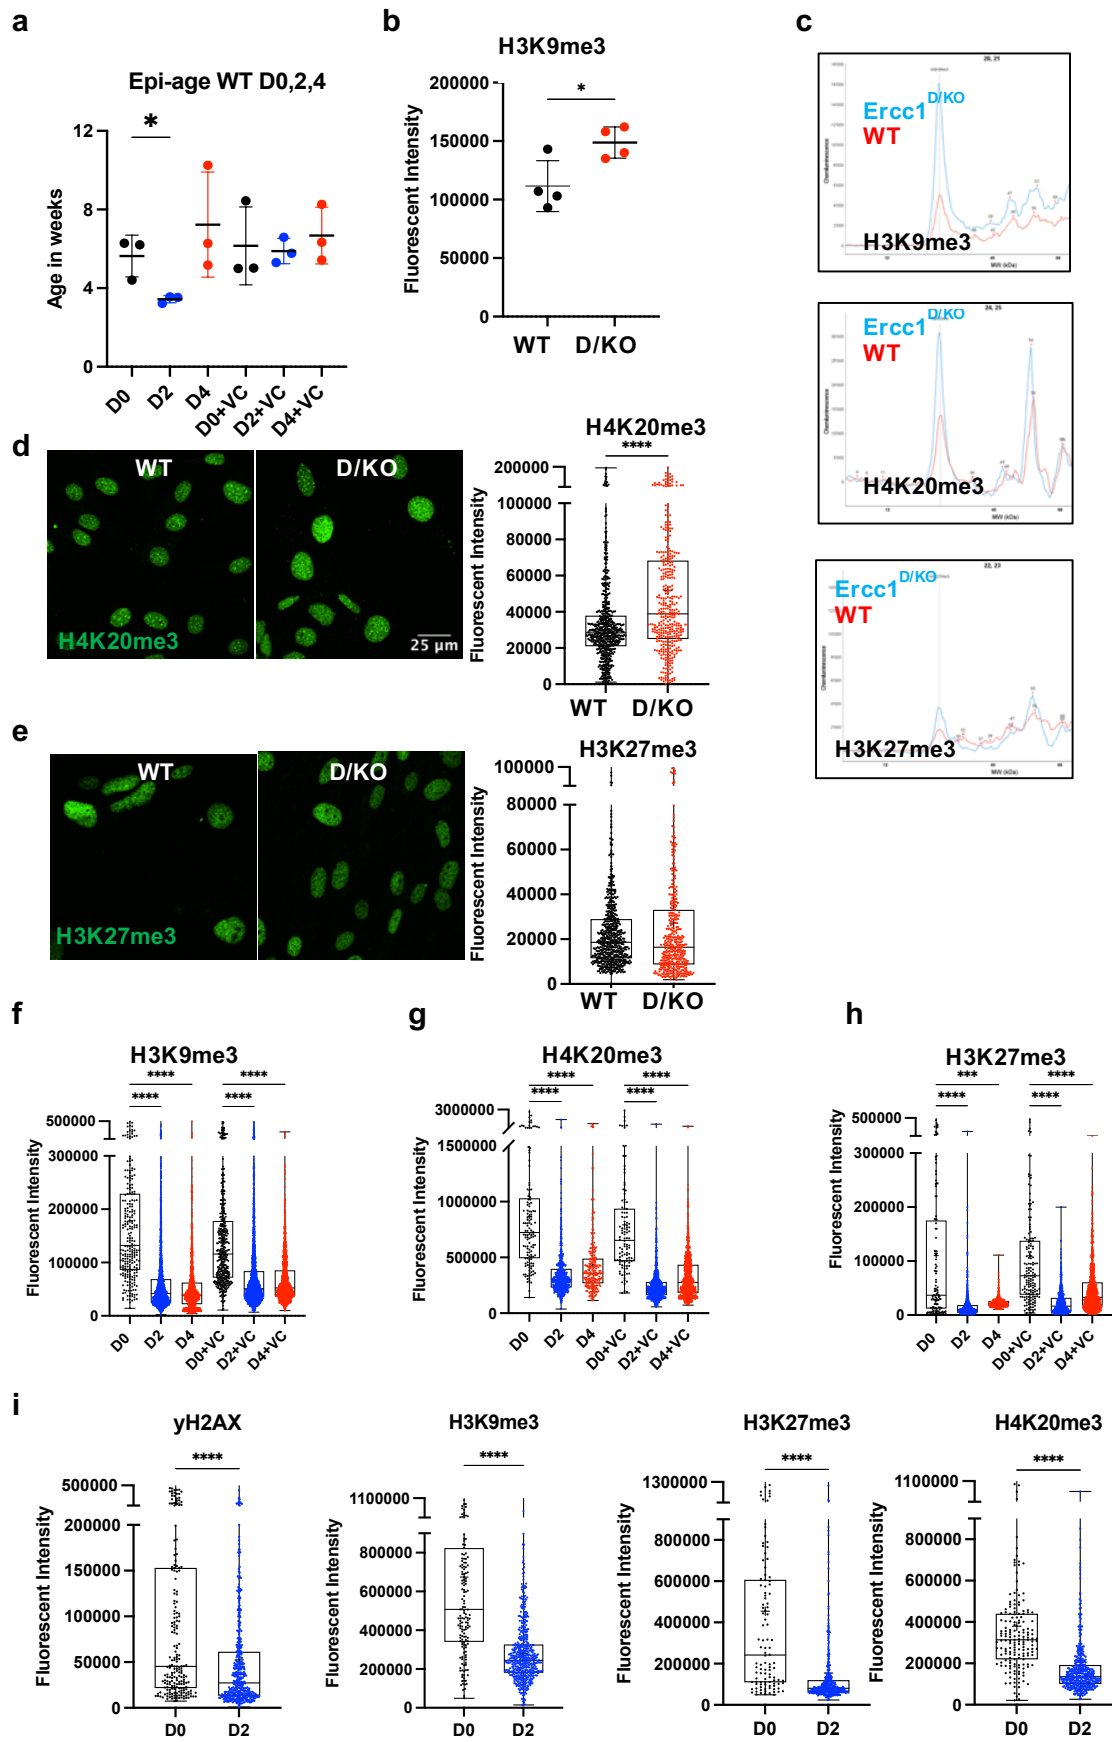

Fig. S2

**Figure S2: DNA methylation clock is restored in *Ercc1*<sup>Δ/-</sup> following short term reprogramming.**

**(a)** DNA Methylation Age Skin Final clock analysis of WT Fb during time course, n = 3, \* p<0.05 according to unpaired t-test. **(b)** Quantification of mean values of H3K9me3 levels in fibroblasts from WT and D/KO mice (n=4) according to unpaired t-test, \* p<0.05. **(c)** Western capillary chemiluminescence quantification shows increased H3K9me3 and H4K20me3, with unchanged H3K27me3 in fibroblasts from D/KO vs WT mice (n=1 each). **(d)** IF and quantification shows increased H4K20me3 in fibroblasts from D/KO mice vs WT, imaged with Nikon laser confocal spinning disc, according to Mann-Whitney test, \*\*\*\* p<0.0001 **(e)** IF quantification shows unchanged H3K27me3 in fibroblasts from WT and D/KO mice, imaged with Nikon laser confocal spinning disc. **(f, g,h)** IF quantification of 2<sup>nd</sup> experiment shows significantly decreased H3K9me3, H4K20me3, and H3K27me3 levels during time course in 4F.D/KO Fbs after 2 and 4 days doxycycline induction with or without VC at 100x according to Kruskal-Wallis test, \* p<0.000. **(i)** IF quantification of 3<sup>rd</sup> experiment shows  $\gamma$ H2AX, H3K9me3, H4K20me3, and H3K27me3 in 4F.D/KO Fbs after 2 doxycycline induction at 100x according to Mann-Whitney test, \* p<0.000.

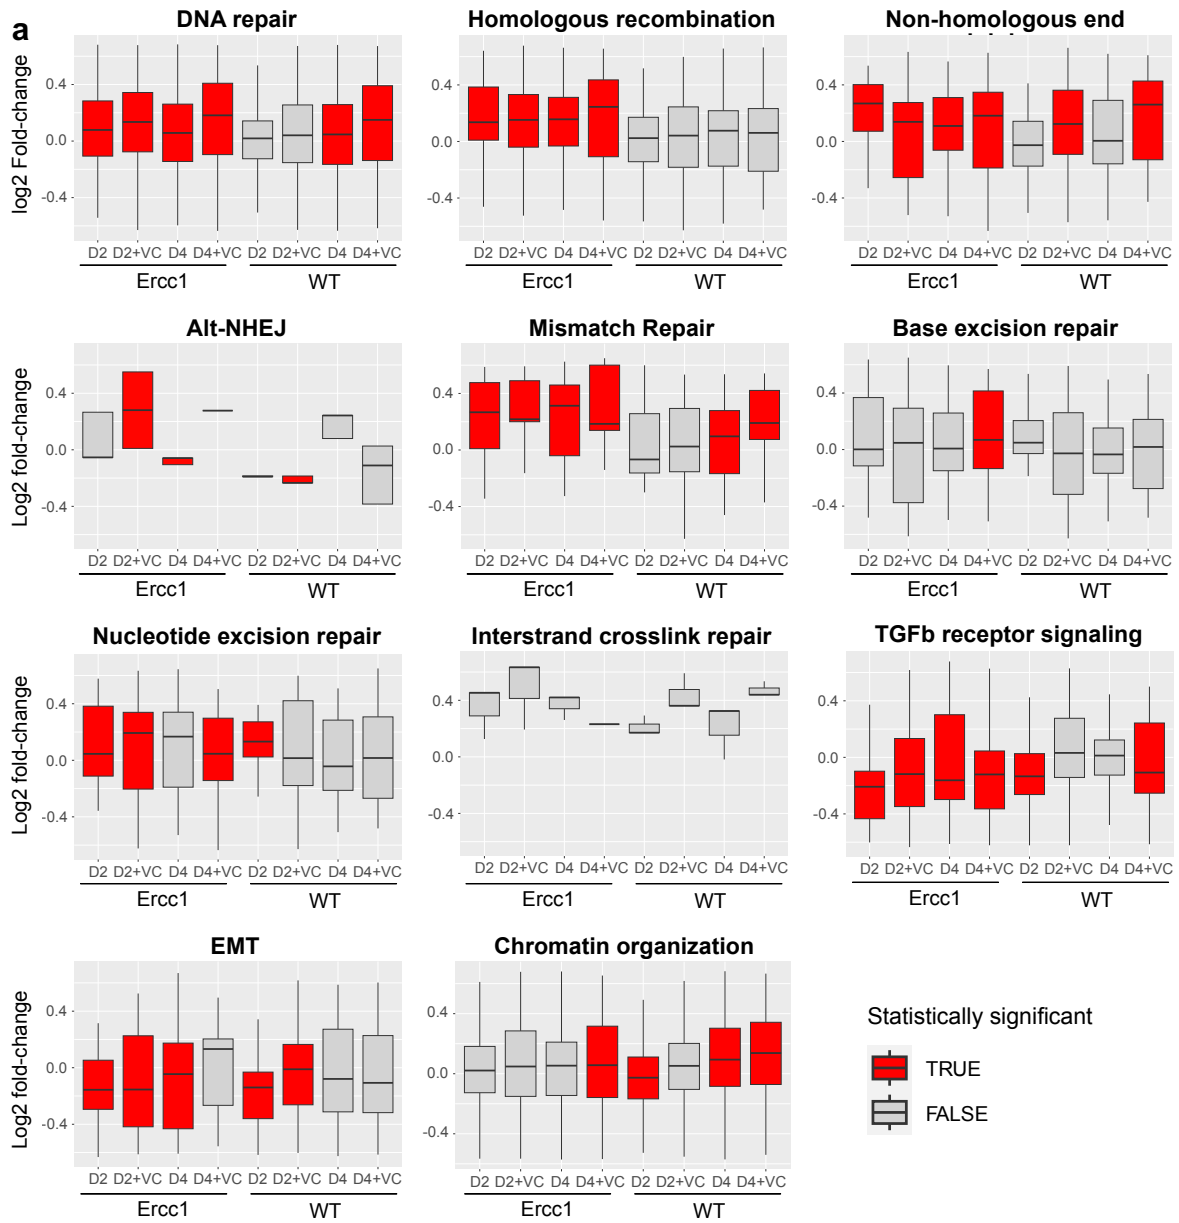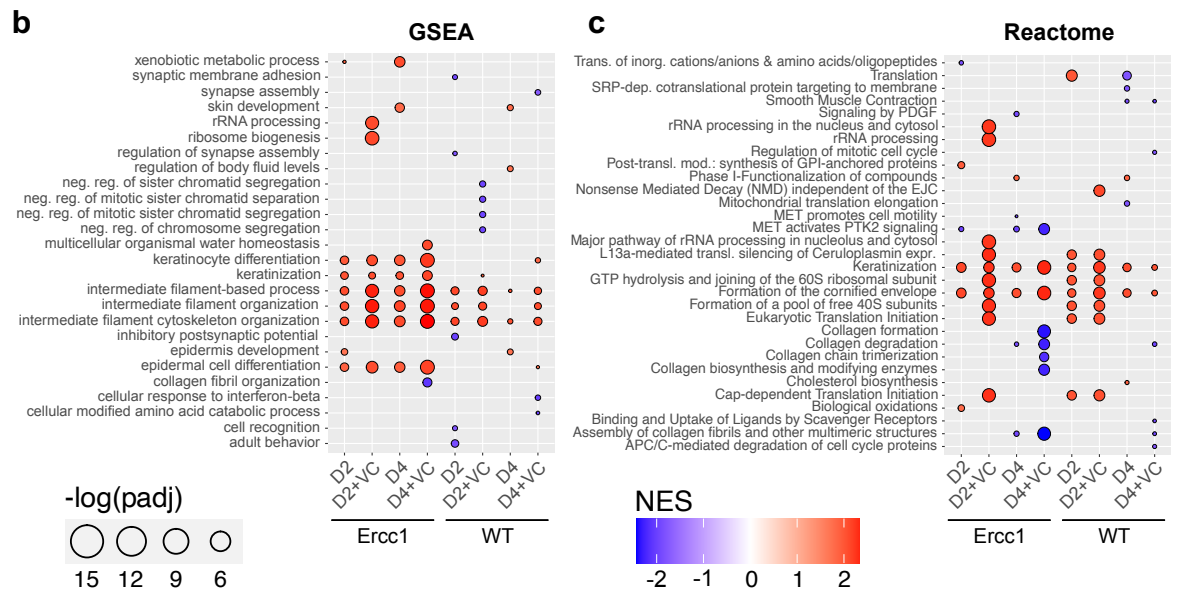

**Fig. S3**

**Figure S3: Initiation phase reprogramming drives transcriptomic reset and upregulates DNA repair and chromatin organization in *Ercc1*<sup>Δ/-</sup>**

**(a)** Log<sub>2</sub> fold-change of genes within a given GO pathway for *Ercc1* and WT reprogramming at days 0, 2, and 4 with and without VC enhancement. The inner boxplot depicts medians and the first and third quartiles, with whiskers extending up to the 1.5x interquartile range and outliers removed for improved visualization of differences between conditions. Statistical significance (Wilcoxon Test, p-value < 0.05) is indicated by red coloring. **(b and c)** GSEA and Reactome analysis of *Ercc1* and WT reprogramming considering log<sub>2</sub> fold-changes between day 0 and day 2 of reprogramming and day 0 and day 4 of reprogramming with and without VC enhancement. Gene ontology biological process terms and Reactome terms are plotted against the normalized enrichment score (NES) with -log(adjusted p-value) illustrated through circle size. The top 10 terms for each condition are included.

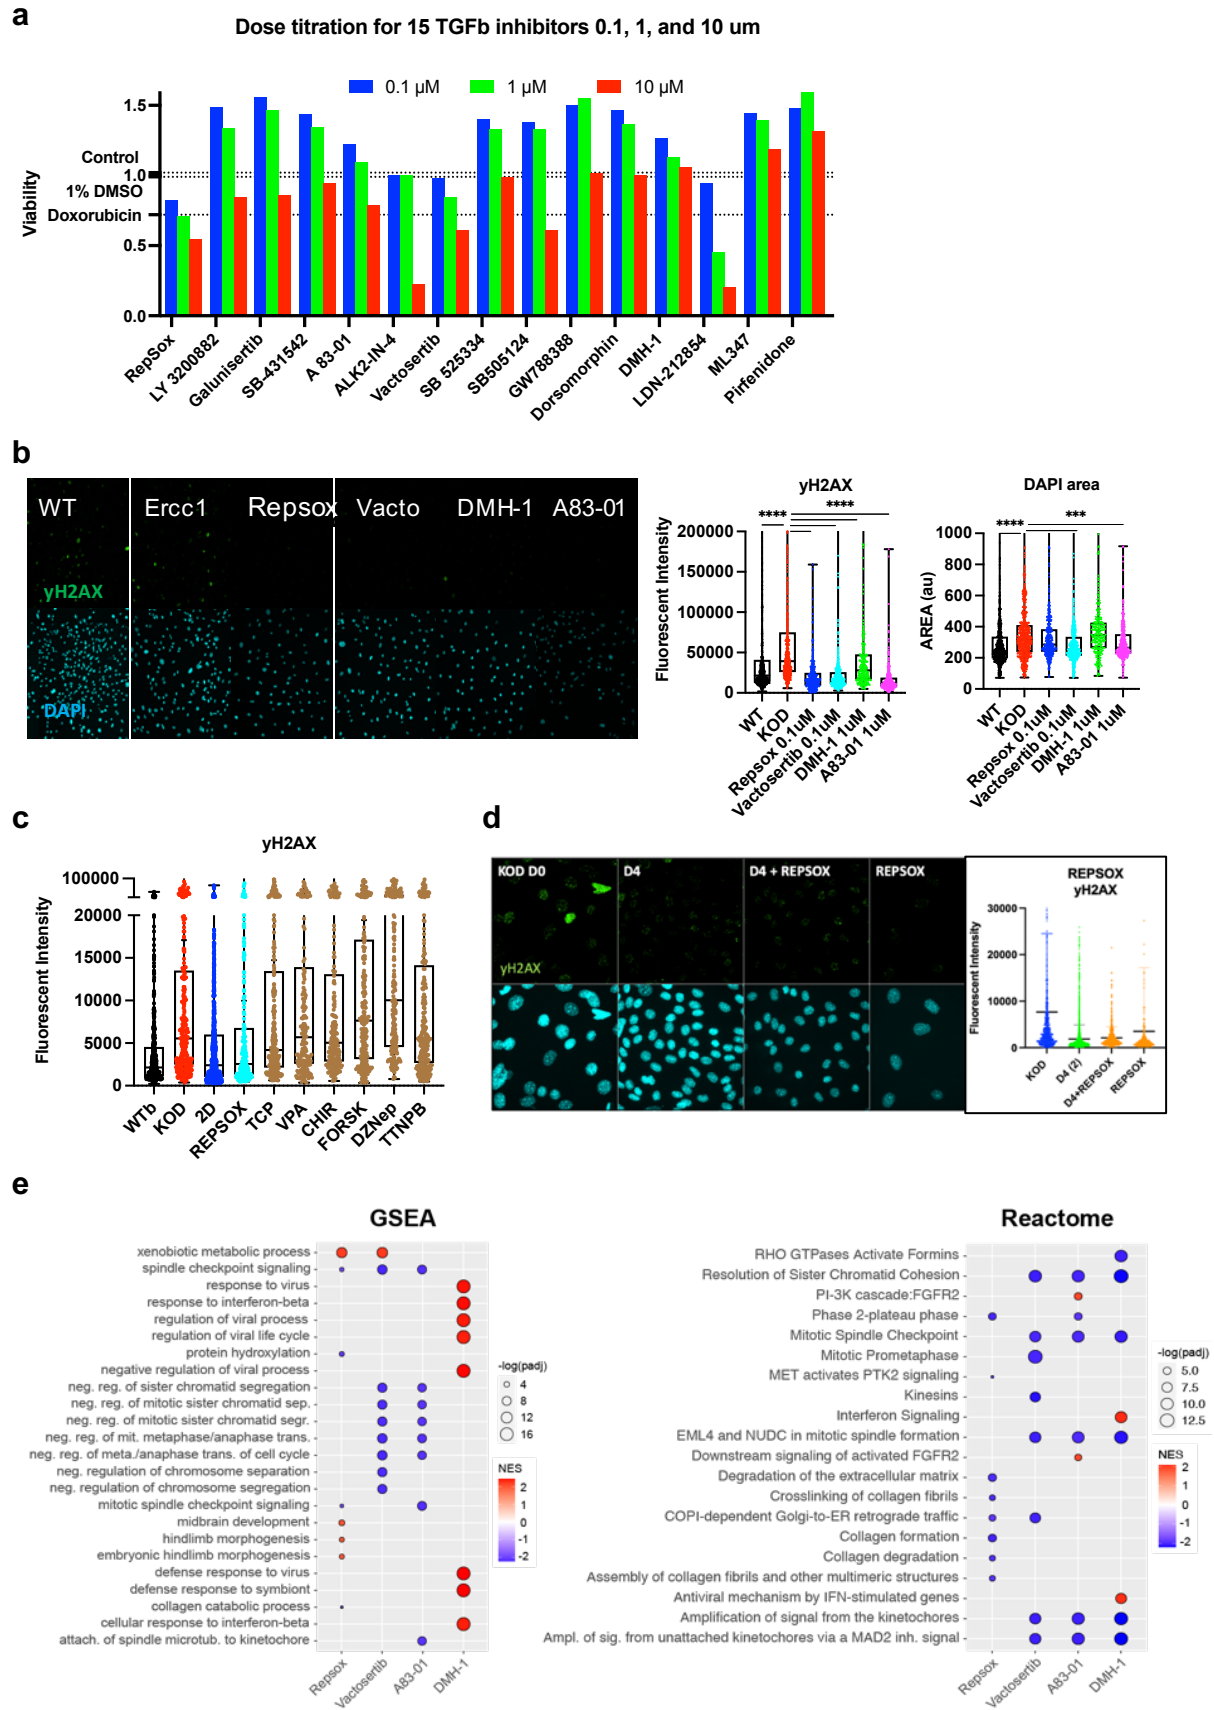

Fig. S4

**Figure S4: Inhibition of ALK5 or ALK2 receptors improves DNA damage phenotype and resets the DNA methylation clock and transcriptome in *Ercc1*<sup>Δ/-</sup>**

**(a)** Cell viability quantification using MTS assay in 96 well plates following treatment with high, medium, and low concentrations of 15 inhibitors in triplicate. Dosage range is 10μm, 1μm, and 0.1 μm. Controls are represented by dashed lines and include untreated D/KO Fbs, 1% DMSO, and Doxorubicin (0.1μm). **(b)** IF images and quantification of γH2AX levels and DAPI area in WT vs D/KO Fbs treated with Repsox, Vactosertib, DMH-1, and A83-01 in 24 wells plates, n = 1. **(c)** IF quantification of γH2AX levels comparing 2 days of doxycycline induction to seven single small molecules used in chemical reprogramming at published dosages: Repsox (3μm), TCP (10μm), VPA (500μm), CHIR99021 (5μm), Forskolin (10μm), DZNep (0.5μm), and TTNPB (1μm), n = 1. **(d)** IF images and quantification of γH2AX levels in 4F.D/KO cells after 4 days of induction either with doxycycline alone, doxycycline and Repsox, or Repsox alone, n = 1. **(e)** GSEA and Reactome analysis of *Ercc1* cells treated with TGFβ inhibitors considering log<sub>2</sub> fold-changes, n = 3. Gene ontology biological process terms or Reactome terms are plotted against the normalized enrichment score (NES) with -log<sub>10</sub>(adjusted p-value) indicated through circle size. The top 10 terms for each condition are included.

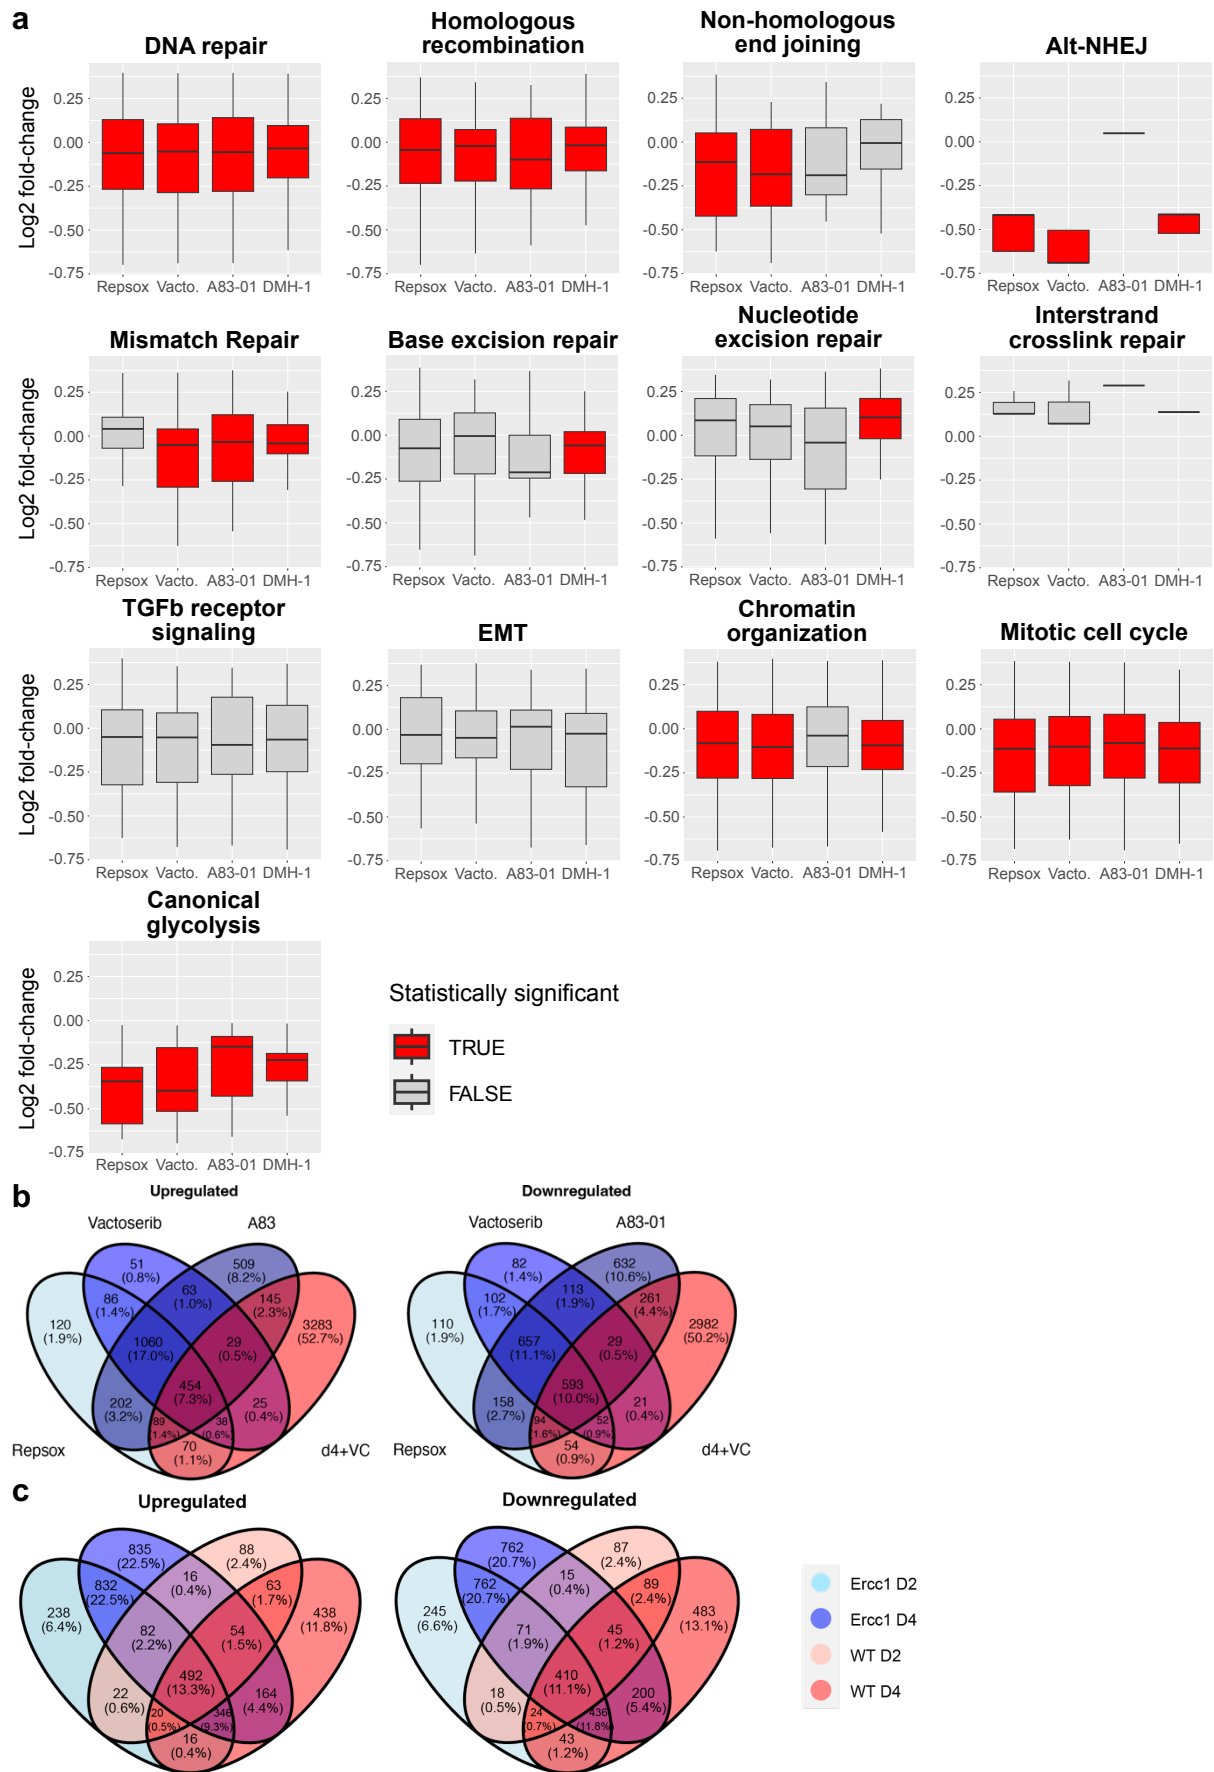



**Figure S5: GO term analysis of TGFb inhibition in Ercc1<sup>Δ/-</sup>.** **(a)** Log2 fold-change of genes within a given GO pathway for Ercc1 cells treated with TGFb inhibitors compared to non-treated Ercc1 cells. The inner boxplot depicts medians and the first and third quartiles, with whiskers extending up to the 1.5x interquartile range and outliers removed for improved visualization of differences between conditions. Statistical significance (Wilcoxon Test, p-value < 0.05) is indicated by red coloring. **(b)** Venn Diagram showing the overlap of significant genes (adjusted p-value < 0.05) for the ALK5 inhibitors and enhanced reprogramming day 4+VC. **(c)** Venn Diagram showing the overlap of significant genes (adjusted p-value < 0.05) for the reprogramming time course at day 2 and 4 without VC.
